# Supplementary material for: HIV-1 uncoating by release of viral cDNA from capsid-like structures in the nucleus of infected cells
Source: eLife. 2021 Apr 27;10:e64776. doi: 10.7554/eLife.64776 (PMC8169111; doi:10.7554/eLife.64776)
Supplement: Figure 1—figure supplement 1—source data 1. [file elife-64776-fig1-figsupp1-data1.xlsx]

## Sheet: data
	Figure 1 - figure supplement 1 - source data
	Source data of Figure 1 - figure supplement 1c. Given are the number of cells showing between 0-4 eGFP.OR3 punctae per cell nucleus.								Source data of Figure 1 - figure supplement 1d. Given are the number of eGFP.OR3 punctae per cell nucleus for different MOIs.
	no. of punctae/cell		0	1	2	3	4		MOI	0.02	0.15	1.2	4.8	19
	no. of cells	1 x LV amount	3	40	7	1	0		no. of punctae/cell	2	0	3	12	33
		9 x LV amount	6	26	17	3	1			2	0	4	11	32
										1	3	10	7	37
										4	3	12	7	0
										0	1	4	16	32
										1	1	5	4	24
										2	2	2	13	20
										1	2	16	9	18
										1	1	0	13	4
										2	1	3	9	26
										1	4	3	11	27
										1	2	3	8	32
										3	0	7	4	19
											0	4	14	27
												0	1	18
												2	16	15
												7	15	26
													8	29
													11	12
													29	25
													24	38
													2
													7
