# Supplementary material for: HIV-1 uncoating by release of viral cDNA from capsid-like structures in the nucleus of infected cells
Source: eLife. 2021 Apr 27;10:e64776. doi: 10.7554/eLife.64776 (PMC8169111; doi:10.7554/eLife.64776)
Supplement: Figure 1—figure supplement 3—source data 1. [file elife-64776-fig1-figsupp3-data1.xlsx]

## Sheet: data
	Figure 1 - figure supplement 3 - source data
	Source data of Figure 1 - figure supplement 3a. Given are the number of IN.SNAP.SiR or eGFP.OR3 punctae per cell nucleus with and without flavopiridol treatment.
		IN	IN + flavo	OR	OR + flavo
	no of punctae/cell	8	1	14	0
		6	10	13	2
		7	6	10	5
		2	2	2	4
		3	2	2	0
		6	4	2	3
		6	8	13	8
		11	4	25	3
		9	8	10	0
		2	6	6	1
		6	9	10	11
		12	9	7	6
		7	5	2	4
		9	9	2	6
		6	7	2	5
		9	9	1	6
		5	8	1	6
		0	7	0	5
		8	6	5	7
		11	0	1	3
		5	2	0	1
		1	6	0	5
		7	2	0	5
		8	4	0	5
		5	2	4	8
		1		0
		6		2
		8		2
		6		0
		12		3
		3		0
