# Supplementary material for: HIV-1 uncoating by release of viral cDNA from capsid-like structures in the nucleus of infected cells
Source: eLife. 2021 Apr 27;10:e64776. doi: 10.7554/eLife.64776 (PMC8169111; doi:10.7554/eLife.64776)
Supplement: Figure 1—source data 1. [file elife-64776-fig1-data1.xlsx]

## Sheet: data
	Figure 1 - source data
	Source data of Figure 1f. Given are the number of eGFP.OR3 punctae per cell nucleus.									Source data of Figure 1h. Given are the normalized (to the maximum value) number of eGFP.OR3 punctae per cell nucleus and normalized number of 2-LTR circles quantified by ddPCR in biological triplicates.
	-drug	uninfected	-VSV-G	5 µM EFV	20 µM EFV	5 µM AZT	20 µM AZT			time h	eGFP.OR3		ddPCR 2-LTR
	8	0	0	0	0	0	0			0			0	0	0
	3	0	0	0	0	0	0			2.16667	0	0
	4	0	0	0	0	0	0			2.66667	0	0
	8	0	0	0	0	0	0			3			0.00460853	0.00380781	0.00234344
	3	0	0	0	0	0	0			3.16667	0	0
	11	0	0	0	0	0	0			3.66667	0	0
	10	0	0	1	0	0	0			4.16667	0	0
	7	0	0	0	0	0	0			4.66667	0	0
	6	0	0	0	0	0	0			5.16667	0	0
	0	0	0	0	0	1	0			5.66667	0	0
	1	0	0	0	0	1	0			6			0.0217145	0.00799571	0.0187764
	1	0	0	0	0	1	0			6.16667	0	0
	0	0	0	0	0	2	0			6.66667	0	0
	6	1	0	0	0	2	2			7.16667	0	0
	6	0	0	0	0	0	0			7.66667	0	0
	0	0	0	0	0	1	0			8.16667	0	0
	0	0	0	0	0	1	0			8.66667	0	0
	3	0	0	0	0	2	0			9.16667	0	0
	4	0	0	0	0	0	0			9.66667	0	0
	4	0	0	0	0	0	0			10.1667	0.111111	0
	3	0	0		0	0	0			10.6667	0.111111	0
	6	0	0		0	2	0			11.1667	0.111111	0
		0	0		0	0	0			11.6667	0.222222	0.0909091
		0	0			0	0			12			0.159234	0.153077	0.146779
		0	0			0	1			12.1667	0.222222	0.181818
		0				1	1			12.6667	0.222222	0.181818
		0				3				13.1667	0.222222	0.181818
						1				13.6667	0.222222	0.272727
						0				14.1667	0.555556	0.272727
										14.6667	0.444444	0.363636
										15.1667	0.555556	0.636364
										15.6667	0.555556	0.636364
										16.1667	0.555556	0.636364
										16.6667	0.555556	0.636364
										17.1667	0.555556	0.727273
										17.6667	0.888889	0.727273
										18.1667	1	0.545455
										18.6667	0.555556	0.636364
										19.1667	0.777778	0.636364
										19.6667	0.555556	0.545455
										20.1667	0.555556	0.454545
										20.6667	0.666667	0.727273
										21.1667	0.888889	0.454545
										21.6667	0.555556	0.636364
										22.1667	0.666667	0.727273
										22.6667	0.666667	0.727273
										23.1667	0.666667	0.727273
										23.6667	0.666667	0.727273
										24			1	0.627006	0.556289
										24.1667	0.555556	0.727273
										24.6667	0.666667	0.727273
										25.1667	0.666667	0.727273
										25.6667	0.666667	0.636364
										26.1667	0.666667	1
										26.6667	0.666667	0.909091
										27.1667	0.777778	0.909091
										27.6667	0.777778	0.818182
										28.1667	0.777778	0.909091
										28.6667	0.777778	0.909091
										29.1667	0.777778	0.909091
										29.6667	0.777778	0.909091
										30.1667	0.777778	0.909091
										30.6667	0.888889	0.545455
										31.1667	0.777778	0.454545
										31.6667	0.777778	0.818182
										32.1667	0.777778	0.636364
										32.6667	0.777778	0.727273
										33.1667	0.888889	0.818182
										33.6667	0.888889	0.727273
										34.1667	0.888889	0.636364
										34.6667	0.888889	0.636364
										35.1667	0.888889	0.545455
										35.6667	0.888889	0.636364
										36.1667	1	0.636364
										36.6667	1	0.545455
