# Supplementary material for: HIV-1 uncoating by release of viral cDNA from capsid-like structures in the nucleus of infected cells
Source: eLife. 2021 Apr 27;10:e64776. doi: 10.7554/eLife.64776 (PMC8169111; doi:10.7554/eLife.64776)
Supplement: Figure 2—source data 1. [file elife-64776-fig2-data1.xlsx]

## Sheet: data
	Figure 2 - source data
	Source data of Figure 2a-b. Given are the total FISH signals per cell, percent of cytoplasmic FISH signal, number of nuclear FISH signals per cell (a) and number of nuclear IN.SNAP signals per cell (b).					Source data of Figure 2e. Given are the percentages of EdU-positive subviral structures per cell.				Source data of Figure 2f. Given are the normalized (to the geometrical mean EdU intensity of eGFP.OR3 objects) intensities of EdU localized at different subviral structures per cell.
	total FISH	percent cytoplasmic	nuclear FISH	nuclear IN.SNAP		cytopl. IN	nuclear IN	eGFP.OR3		IN cytoplasm	IN nucleus	eGFP.OR3
	111.053	88.2464	13.0526	22		0	0	100		0.297958	0.414337	3.05823
	111.053	80.1422	22.0526	8		0	45.5	100		0.322921	0.572891	2.63113
	67.0526	89.4819	7.05263	3		0	100	42.9		0.149777	0.386639	1.63478
	65.0526	92.233	5.05263	29		0	7.7	50		0.113301	0.403736	3.28027
	74.0526	78.3227	16.0526	19		0	18.2	100		0.385271	0.544053	3.12195
	117.053	89.7032	12.0526	5		0	36.4	100		0.341158	0.311066	2.42219
	127.053	92.0878	10.0526	7		0	0	100		0.168699	0.436564	3.17427
	98.0526	91.7874	8.05263	18		20	33.3	66.7		0.151259	1.01937	0.329304
	59.0526	84.6702	9.05263	29		0	11.1	100		0.144761	0.834488	0.61347
	34.0526	76.3524	8.05263	18		0	53.8	66.7		0.299782	1.41	0.200842
	102.053	83.2904	17.0526	15		8.3	70	100		0.432689	0.854777	1.26228
	72.0526	79.1088	15.0526	7		11.1	38.5	75		0.478511	0.570269	0.658494
	54.0526	90.6524	5.05263	3		0	33.3	100		0.369199	0.167901	1.78296
	79.0526	77.1638	18.0526	24		0	0	100		0.169496	0.27915	1.41479
	67.0526	71.5856	19.0526	1		0	33.3	100		0.23253	0.400773	0.535048
	37.0526	56.6761	16.0526	12		14.3	36.4	0		0.216002	0.309584	0.713093
	75.0526	61.2903	29.0526	3		0	66.7	100		0.14328	0.356774	0.59831
	73.0526	87.6081	9.05263	1		0	0	100		0.191154	0.269804	0.370567
	80.0526	88.6917	9.05263	12		25	50	100		0.154792	1.07351	1.05437
	91.0526	75.7803	22.0526	0		0	11.1	50		0.31118	0.883045	0.878942
				1		0	9.1	100		0.21851	0.732699	0.819783
				17		33.3	14.3	50		0.286218	1.61723	0.51453
				14		0	7.7	33.3		0.355635	0.640256	1.06747
						0	35.7	100		0.172118	0.427901	0.817276
						20	28.6	100		0.350505	0.471102	0.684027
						11.1	9.1			0.295792	0.322807	0.222614
						25	76.2			0.344806	0.928867	0.568787
						20	21.4			0.325429	0.742843	0.908806
						20	25			0.165507	0.734636	0.867087
						0	31.8			0.0387551	0.960555	1.56776
						0	11.1			0.15901	0.849876	1.29864
						20	65.4			0.309242	0.3904	1.54849
						0	33.3			0.2005	0.265472	1.03225
						0	41.2			0.21794	1.72129	1.31893
						0	40			0.261597	0.706596	0.708875
						0	20			0.120483	0.64265	0.353355
						0	5.6			0.200614	1.08868	1.13871
						0	14.3			0.152399	0.442833	1.50096
						12.5	0			0.194231	0.258063	1.76746
						0	25			0.143622	0.550322	0.331242
						0	10			0.313802	0.627034	0.778293
						0	35.7			0.0951778	0.413539	2.55738
						0	30.8			0.0740906	0.621221	2.92977
						0	72			0.105323	0.276187	2.97707
						0	100			0.0875408	0.667841	3.20504
						0	61.5			0.0287243	0.509401	2.29931
						0	31.3			0.561948	0.426078	3.30193
						25	23.1			0.180325	0.514758	2.16937
						0	75			0.428357	0.323035	2.65005
						33.3	85.7			0.164595	0.192749	1.57551
						0	50			0.468708	0.13929	1.12356
						14.3	66.7			0.188646	0.325998	0.280062
						15.8	61.5			0.254758	0.336485	1.39279
						7.7	20			0.137922	0.207112	0.866517
						28.6	20			0.360764	1.31767	0.850445
						0	77.8			0.302289	0.940266	1.80542
						0	22.2			0.256353	0.42414	1.5225
						16.7	60			0.672514	0.297844	1.47862
						0	73.3			0.279834	0.491961	0.976513
						16.7	40			0.248374	0.48535	0.775671
										0.327822	0.677415	1.27812
										0.276643	0.875864	1.18226
										0.170864	0.798924	1.09312
										0.0868569	0.806219	1.25999
										0.0889087	2.2495	1.68926
										0.210987	0.681633	1.49469
										0.318019	1.28028	1.14692
										0.34321	0.525815	1.42505
										0.240623	0.345832	1.57072
										0.129145	0.316196	2.43792
										0.178045	0.567762	3.13734
										0.292715	0.307077	2.26763
										0.286901	0.261825	2.49275
										0.114213	0.358484	2.74226
										0.192407	0.217256	3.80427
										0.22022	0.45218	3.05971
										0.405902	0.758801	0.131995
										0.589989	0.26399	0.105893
										0.35894	0.683913	0.507463
										0.670349	0.662825	0.617003
										0.535732	0.543141	0.488998
										0.27915	0.514188	0.207567
										0.166533	0.524903	0.174968
										0.187164	0.245639	0.133705
										0.219308	0.803028	0.121851
										0.362588	0.245297	0.0840073
										0.292145	0.853067	2.43952
										0.214065	0.95725	3.72664
										0.219764	0.785816	4.80027
										0.293513	0.313232	4.59988
										0.242219	0.527639	3.88462
										0.298642	0.44158	5.08181
										0.235152	0.415705	5.50778
										0.37923	0.398949	1.90812
										0.168015	0.315854	1.47281
										0.186366	0.84372	1.06565
										0.278922	0.756065	0.830042
										0.239483	0.355293	1.62133
										0.254871	0.736346	0.664421
										0.11068	0.589647	1.19252
										0.242219	0.59888	0.531628
										0.144761	0.653251	0.856943
										0.463579	0.648235	1.5404
										0.129602	0.515898	0.648349
										0.144875	0.643562	0.514872
										0.340361	0.500168	0.685395
										0.359624	1.0555	1.21007
										0.130285	0.679581	0.319387
										0.227059	0.398151	0.577336
										0.19047	1.80918	0.239825
										0.250312	0.685623	0.715145
										0.501422	0.262167	0.640028
										0.241649	0.228883	0.696451
										0.258519	0.82913	0.884869
										0.213723	0.257265	0.858538
										0.182833	0.209733	1.13575
										0.157756		1.98665
										0.176905		1.67798
										0.236862		0.966825
										0.274135		0.964089
										0.153652		0.719476
										0.165165		0.788323
										0.179983		1.85808
										0.0972296		1.42174
										0.122306		2.79812
										0.429041		1.59808
										0.229111		1.43667
										0.337739		1.21782
										0.32805		3.06188
										0.19047		1.10668
										0.393136		1.24803
										0.23367		0.643448
										0.28599		1.9862
										0.152171		1.19423
										0.373074		1.24552
										0.221588		1.25327
										0.225007		1.22762
										0.187734		1.20813
										0.403053		0.813514
										0.348909		0.972752
										0.258405		0.551462
										0.255213		0.894216
												2.06439
												0.60948
												0.750138
												0.45047
												1.1272
												0.877232
												0.776127
												0.433487
												0.713093
												0.776127
												0.312092
												1.12025
												0.790261
												0.659862
												0.790831
												0.743869
												0.425394
												0.640712
												0.464149
												0.383219
												0.397467
												1.25703
												0.617117
												0.142596
												0.270031
												0.301378
												0.283596
												0.189216
												0.372391
												0.422772
												1.05938
												0.917811
												0.56685
												0.618029
												0.513049
												0.395757
												0.525701
												1.01128
												1.17815
												0.894444
												0.976969
												1.08833
												1.51851
												1.29738
												1.34081
												0.684141
												1.11865
												1.01481
												2.24597
												1.91974
												2.36987
												1.51908
												0.714575
												0.704886
												0.558301
												0.291233
												0.645728
												0.453662
												0.331926
												0.427104
												0.921002
												0.533452
												0.512251
												0.6398
												0.801204
												2.59682
												3.56797
												2.62235
												3.58313
												2.45673
												2.77019
												3.12126
												3.08126
												3.07134
												0.843264
												2.36166
												1.28086
												1.62657
												1.20927
												4.16947
												3.38605
												3.70396
												2.34742
												2.08878
												2.13506
												3.63329
												1.64162
												0.704658
												0.476573
												0.924536
												1.79937
												1.88258
												1.47645
												0.496179
												1.20312
												1.10064
												0.649603
												0.457994
												0.865492
												0.45845
												0.703974
												0.550208
												0.48706
												0.440554
