# Supplementary material for: HIV-1 uncoating by release of viral cDNA from capsid-like structures in the nucleus of infected cells
Source: eLife. 2021 Apr 27;10:e64776. doi: 10.7554/eLife.64776 (PMC8169111; doi:10.7554/eLife.64776)
Supplement: Figure 3—source data 1. [file elife-64776-fig3-data1.xlsx]

## Sheet: data
	Figure 3 - source data
	Source data of Figure 3b. Given are the number of IN.SNAP.SiR punctae per cell nucleus.				Source data of Figure 3c. Given are the percent colocalization of eGFP.OR3 punctae with IN.SNAP.SiR per cell nucleus.
	8 hpi	24 hpi			8 hpi	24 hpi
	12	18			66.6667	7.69231
	16	27			40	30.7692
	14	19			80	14.2857
	12	11			75	0
	7	16			100	18.1818
	7	24			60	11.1111
	10	23			100	9.67742
	6	20			50	14.2857
	10	27			50	15.7895
	12	19			100	0
	5	14			100	14.2857
	11	20			100	35.2941
	12	14			66.6667	50
	12	19			50	0
	14	17			50	10.3448
	16	16			60	12.5
	18	16			100	13.3333
	9	15			33.3333	5
	29	24			50	11.1111
	18	25			66.6667	0
