# Supplementary material for: HIV-1 uncoating by release of viral cDNA from capsid-like structures in the nucleus of infected cells
Source: eLife. 2021 Apr 27;10:e64776. doi: 10.7554/eLife.64776 (PMC8169111; doi:10.7554/eLife.64776)
Supplement: Figure 4—figure supplement 1—source data 1. [file elife-64776-fig4-figsupp1-data1.xlsx]

## Sheet: data
	Figure 4 - figure supplement 1 - source data
	Source data of Figure 4 - figure supplement 1a. Given are the CA IF intensities of nuclear IN.SNAP objects with different treatments.			Source data of Figure 4 - figure supplement 1b. Given are the CA IF intensities of cell-associated IN.SNAP objects with different treatments.
	sample	CA IF intensity AU		sample	CA IF intensity AU
	15 µM PF74 - MeOH	2303.76		15 µM PF74 - MeOH	3674.45
	15 µM PF74 - MeOH	874.26		15 µM PF74 - MeOH	3477.55
	15 µM PF74 - MeOH	3194.74		15 µM PF74 - MeOH	2610.85
	15 µM PF74 - MeOH	4325.94		15 µM PF74 - MeOH	2544.25
	15 µM PF74 - MeOH	4766.94		15 µM PF74 - MeOH	2273.64
	15 µM PF74 - MeOH	1807.6		15 µM PF74 - MeOH	3803.05
	15 µM PF74 - MeOH	3536.56		15 µM PF74 - MeOH	4093.85
	15 µM PF74 - MeOH	3947.86		15 µM PF74 - MeOH	4172.05
	15 µM PF74 - MeOH	6052.56		15 µM PF74 - MeOH	5937.05
	15 µM PF74 - MeOH	3340.46		15 µM PF74 - MeOH	5192.15
	15 µM PF74 - MeOH	3551.96		15 µM PF74 - MeOH	5728.45
	15 µM PF74 - MeOH	3811.86		15 µM PF74 - MeOH	4890.05
	15 µM PF74 - MeOH	6182.66		15 µM PF74 - MeOH	3905.95
	15 µM PF74 - MeOH	1503.11		15 µM PF74 - MeOH	6129.35
	15 µM PF74 - MeOH	1882.25		15 µM PF74 - MeOH	4089.45
	15 µM PF74 - MeOH	1406.88		15 µM PF74 - MeOH	5193.45
	15 µM PF74 - MeOH	3328.4		15 µM PF74 - MeOH	5481.85
	15 µM PF74 - MeOH	6110.84		15 µM PF74 - MeOH	3800.72
	15 µM PF74 - MeOH	2133.2		15 µM PF74 - MeOH	8476.65
	15 µM PF74 - MeOH	5115.04		15 µM PF74 - MeOH	4827.18
	15 µM PF74 - MeOH	5454.54		15 µM PF74 - MeOH	6231.05
	15 µM PF74 - MeOH	5049.94		15 µM PF74 - MeOH	7784.05
	15 µM PF74 - MeOH	5545.14		15 µM PF74 - MeOH	5617.35
	15 µM PF74 - MeOH	3932.36		15 µM PF74 - MeOH	7203.85
	15 µM PF74 - MeOH	3211.06		15 µM PF74 - MeOH	7370.95
	15 µM PF74 - MeOH	4330.16		15 µM PF74 - MeOH	10809.4
	15 µM PF74 - MeOH	2932.36		15 µM PF74 - MeOH	5991.95
	15 µM PF74 - MeOH	4543.03		15 µM PF74 - MeOH	10640
	15 µM PF74 - MeOH	3510.43		15 µM PF74 - MeOH	7452.65
	15 µM PF74 - MeOH	2790.27		15 µM PF74 - MeOH	7616.95
	15 µM PF74 - MeOH	5718.63		15 µM PF74 - MeOH	1878.38
	15 µM PF74 - MeOH	5954.63		15 µM PF74 - MeOH	8834.35
	15 µM PF74 - MeOH	6277.93		15 µM PF74 - MeOH	9632.85
	15 µM PF74 - MeOH	7529.33		15 µM PF74 - MeOH	3352.7
	15 µM PF74 - MeOH	6788.53		15 µM PF74 - MeOH	3122.43
	15 µM PF74 - MeOH	8109.43		15 µM PF74 - MeOH	2263.52
	15 µM PF74 - MeOH	6929.83		15 µM PF74 - MeOH	2666.44
	15 µM PF74 - MeOH	4274.07		15 µM PF74 - MeOH	4347.99
	15 µM PF74 - MeOH	3193.67		15 µM PF74 - MeOH	6145.37
	15 µM PF74 - MeOH	4285.07		15 µM PF74 - MeOH	6210.27
	15 µM PF74 - MeOH	3924.57		15 µM PF74 - MeOH	5600.87
	15 µM PF74 - MeOH	5271.07		15 µM PF74 - MeOH	4349.5
	15 µM PF74 + MeOH	1170.21		15 µM PF74 - MeOH	8197.17
	15 µM PF74 + MeOH	567.41		15 µM PF74 - MeOH	8002.97
	15 µM PF74 + MeOH	-1514.54		15 µM PF74 - MeOH	8899.67
	15 µM PF74 + MeOH	1699.31		15 µM PF74 - MeOH	8738.87
	15 µM PF74 + MeOH	1631.61		15 µM PF74 - MeOH	6314.37
	15 µM PF74 + MeOH	6370.51		15 µM PF74 - MeOH	4853.45
	15 µM PF74 + MeOH	5843.11		15 µM PF74 - MeOH	4069.55
	15 µM PF74 + MeOH	4312.31		15 µM PF74 - MeOH	6110.25
	15 µM PF74 + MeOH	3930.31		15 µM PF74 - MeOH	6312.65
	15 µM PF74 + MeOH	6989.51		15 µM PF74 - MeOH	6344.95
	15 µM PF74 + MeOH	4119.71		15 µM PF74 - MeOH	6067.55
	15 µM PF74 + MeOH	4307.11		15 µM PF74 - MeOH	4149.75
	15 µM PF74 + MeOH	3256.21		15 µM PF74 - MeOH	2804.19
	15 µM PF74 + MeOH	4099.91		15 µM PF74 - MeOH	6162.54
	15 µM PF74 + MeOH	4430.81		15 µM PF74 - MeOH	3970.44
	15 µM PF74 + MeOH	4143.71		15 µM PF74 - MeOH	8845.64
	15 µM PF74 + MeOH	3514.51		15 µM PF74 - MeOH	9315.64
	15 µM PF74 + MeOH	3819.61		15 µM PF74 - MeOH	8902.64
	15 µM PF74 + MeOH	3315.31		15 µM PF74 - MeOH	4981.34
	15 µM PF74 + MeOH	6353.41		15 µM PF74 - MeOH	7729.74
	15 µM PF74 + MeOH	3607.41		15 µM PF74 - MeOH	5883.84
	15 µM PF74 + MeOH	-2583.31		15 µM PF74 - MeOH	5810.14
	15 µM PF74 + MeOH	2487.31		15 µM PF74 - MeOH	8531.44
	15 µM PF74 + MeOH	4440.51		15 µM PF74 - MeOH	15269.2
	15 µM PF74 + MeOH	4677.31		15 µM PF74 - MeOH	6271.14
	15 µM PF74 + MeOH	1675.41		15 µM PF74 - MeOH	1748.63
	15 µM PF74 + MeOH	3722.61		15 µM PF74 - MeOH	105.6
	15 µM PF74 + MeOH	1748.97		15 µM PF74 - MeOH	-609
	15 µM PF74 + MeOH	2084.77		15 µM PF74 - MeOH	2933.2
	15 µM PF74 + MeOH	-1182.69		15 µM PF74 - MeOH	3764.8
	15 µM PF74 + MeOH	1100.78		15 µM PF74 - MeOH	3827.8
	15 µM PF74 + MeOH	2383.27		15 µM PF74 - MeOH	584.5
	15 µM PF74 + MeOH	843.92		15 µM PF74 - MeOH	4415.1
	15 µM PF74 + MeOH	2312.97		15 µM PF74 - MeOH	5178.3
	15 µM PF74 + MeOH	1589.37		15 µM PF74 - MeOH	-1203.47
	15 µM PF74 + MeOH	3568.77		15 µM PF74 - MeOH	4436.3
	15 µM PF74 + MeOH	4731.57		15 µM PF74 - MeOH	2602.9
	15 µM PF74 + MeOH	3434.67		15 µM PF74 - MeOH	-1901.92
	15 µM PF74 + MeOH	5090.17		15 µM PF74 - MeOH	2167.5
	15 µM PF74 + MeOH	4965.07		15 µM PF74 - MeOH	6620.4
	15 µM PF74 + MeOH	5198.47		15 µM PF74 - MeOH	4902.6
	15 µM PF74 + MeOH	4327.67		15 µM PF74 - MeOH	7905.8
	15 µM PF74 + MeOH	1776.92		15 µM PF74 - MeOH	-1784.49
	15 µM PF74 + MeOH	2988.32		15 µM PF74 - MeOH	-1130.04
	15 µM PF74 + MeOH	8027.82		15 µM PF74 - MeOH	4649.8
	15 µM PF74 + MeOH	4713.52		15 µM PF74 - MeOH	7030.5
	15 µM PF74 + MeOH	3658.62		15 µM PF74 + MeOH	1651.59
	15 µM PF74 + MeOH	4746.72		15 µM PF74 + MeOH	1070.5
	15 µM PF74 + MeOH	5575.22		15 µM PF74 + MeOH	413.68
	15 µM PF74 + MeOH	7146.42		15 µM PF74 + MeOH	1582.19
	15 µM PF74 + MeOH	5239.02		15 µM PF74 + MeOH	3089.79
	15 µM PF74 + MeOH	3553.42		15 µM PF74 + MeOH	3435.49
	15 µM PF74 + MeOH	5004.72		15 µM PF74 + MeOH	3479.49
	15 µM PF74 + MeOH	2937.62		15 µM PF74 + MeOH	7638.69
	15 µM PF74 + MeOH	3755.62		15 µM PF74 + MeOH	-2175.83
	15 µM PF74 + MeOH	2136.32		15 µM PF74 + MeOH	3741.49
	15 µM PF74 + MeOH	3871.82		15 µM PF74 + MeOH	5227.99
	15 µM PF74 + MeOH	3265.17		15 µM PF74 + MeOH	3936.19
	15 µM PF74 + MeOH	5381.47		15 µM PF74 + MeOH	6354.49
	15 µM PF74 + MeOH	5797.47		15 µM PF74 + MeOH	5905.09
	15 µM PF74 + MeOH	3345.07		15 µM PF74 + MeOH	-60.41
	15 µM PF74 + MeOH	5946.27		15 µM PF74 + MeOH	4070.39
	15 µM PF74 + MeOH	5478.67		15 µM PF74 + MeOH	5425.29
	15 µM PF74 + MeOH	5110.27		15 µM PF74 + MeOH	7776.29
	15 µM PF74 + MeOH	5845.17		15 µM PF74 + MeOH	3214.29
	15 µM PF74 + MeOH	5381.87		15 µM PF74 + MeOH	705.19
	15 µM PF74 + MeOH	8449.87		15 µM PF74 + MeOH	-1498.34
	15 µM PF74 + MeOH	6095.77		15 µM PF74 + MeOH	-2601.34
	15 µM PF74 + MeOH	6204.67		15 µM PF74 + MeOH	2137.39
	15 µM PF74 + MeOH	6894.87		15 µM PF74 + MeOH	2694.89
	15 µM PF74 + MeOH	6633.97		15 µM PF74 + MeOH	3965.71
	15 µM PF74 + MeOH	8348.57		15 µM PF74 + MeOH	6622.11
	15 µM PF74 + MeOH	4010.21		15 µM PF74 + MeOH	5745.31
	15 µM PF74 + MeOH	3147.61		15 µM PF74 + MeOH	8359.51
	15 µM PF74 + MeOH	5374.21		15 µM PF74 + MeOH	7330.01
	15 µM PF74 + MeOH	3530.61		15 µM PF74 + MeOH	7844.61
	15 µM PF74 + MeOH	8519.11		15 µM PF74 + MeOH	6202.01
	15 µM PF74 + MeOH	7624.01		15 µM PF74 + MeOH	7421.81
	15 µM PF74 + MeOH	7821.91		15 µM PF74 + MeOH	9165.41
	15 µM PF74 + MeOH	7519.91		15 µM PF74 + MeOH	7495.51
	DMSO - MeOH	1339.5		15 µM PF74 + MeOH	10116.2
	DMSO - MeOH	-719.44		15 µM PF74 + MeOH	7497.81
	DMSO - MeOH	-496.82		15 µM PF74 + MeOH	9482.31
	DMSO - MeOH	2051.3		15 µM PF74 + MeOH	9025.01
	DMSO - MeOH	1783.4		15 µM PF74 + MeOH	12113.4
	DMSO - MeOH	412.1		15 µM PF74 + MeOH	9243.61
	DMSO - MeOH	810.14		15 µM PF74 + MeOH	9970.11
	DMSO - MeOH	802.59		15 µM PF74 + MeOH	6551.51
	DMSO - MeOH	483.51		15 µM PF74 + MeOH	6977.71
	DMSO - MeOH	1535.39		15 µM PF74 + MeOH	5298.66
	DMSO - MeOH	730.13		15 µM PF74 + MeOH	2779.36
	DMSO - MeOH	634.19		15 µM PF74 + MeOH	3087.16
	DMSO - MeOH	-524.57		15 µM PF74 + MeOH	3014.76
	DMSO - MeOH	-635.33		15 µM PF74 + MeOH	5035.96
	DMSO - MeOH	1837.81		15 µM PF74 + MeOH	4832.36
	DMSO - MeOH	531.48		15 µM PF74 + MeOH	6310.46
	DMSO - MeOH	219.32		15 µM PF74 + MeOH	4539.46
	DMSO - MeOH	1186.88		15 µM PF74 + MeOH	4268.56
	DMSO - MeOH	1190.68		15 µM PF74 + MeOH	6907.56
	DMSO - MeOH	-1170.52		15 µM PF74 + MeOH	7449.46
	DMSO - MeOH	636.98		15 µM PF74 + MeOH	4507.16
	DMSO - MeOH	2187.78		15 µM PF74 + MeOH	1557.56
	DMSO - MeOH	1150.08		15 µM PF74 + MeOH	588.66
	DMSO - MeOH	982.5		15 µM PF74 + MeOH	7761.66
	DMSO - MeOH	1283.4		15 µM PF74 + MeOH	1855.56
	DMSO - MeOH	590.6		15 µM PF74 + MeOH	7899.96
	DMSO - MeOH	1974.9		15 µM PF74 + MeOH	1667.23
	DMSO - MeOH	495.5		15 µM PF74 + MeOH	2869.73
	DMSO - MeOH	-603.6		15 µM PF74 + MeOH	4359.43
	DMSO - MeOH	446.3		15 µM PF74 + MeOH	4386.03
	DMSO - MeOH	2029.6		15 µM PF74 + MeOH	7096.43
	DMSO - MeOH	2731.7		15 µM PF74 + MeOH	-2802.4
	DMSO + MeOH	1255.65		15 µM PF74 + MeOH	5223.93
	DMSO + MeOH	2854.45		15 µM PF74 + MeOH	10466.1
	DMSO + MeOH	5769.55		15 µM PF74 + MeOH	13770.2
	DMSO + MeOH	3936.25		15 µM PF74 + MeOH	5682.93
	DMSO + MeOH	3655.75		15 µM PF74 + MeOH	2001.14
	DMSO + MeOH	3698.45		15 µM PF74 + MeOH	2886.94
	DMSO + MeOH	6215.35		15 µM PF74 + MeOH	3381.74
	DMSO + MeOH	5803.45		15 µM PF74 + MeOH	2551.84
	DMSO + MeOH	2939.7		15 µM PF74 + MeOH	4435.84
	DMSO + MeOH	6478.3		15 µM PF74 + MeOH	4225.94
	DMSO + MeOH	3637.8		15 µM PF74 + MeOH	4168.64
	DMSO + MeOH	4120.8		15 µM PF74 + MeOH	3327.54
	DMSO + MeOH	3760.1		15 µM PF74 + MeOH	4324.54
	DMSO + MeOH	5775.3		15 µM PF74 + MeOH	4329.24
	DMSO + MeOH	4715.4		15 µM PF74 + MeOH	6619.74
	DMSO + MeOH	4774		15 µM PF74 + MeOH	6169.04
	DMSO + MeOH	5200.5		15 µM PF74 + MeOH	6221.64
	DMSO + MeOH	5223.4		15 µM PF74 + MeOH	7761.14
	DMSO + MeOH	3807.2		15 µM PF74 + MeOH	5976.24
	DMSO + MeOH	4721.1		15 µM PF74 + MeOH	10874.3
	DMSO + MeOH	1241.2		15 µM PF74 + MeOH	7208.44
	DMSO + MeOH	3262.2		15 µM PF74 + MeOH	11317.2
	DMSO + MeOH	5787		15 µM PF74 + MeOH	-1509.86
	DMSO + MeOH	2946.5		15 µM PF74 + MeOH	2248.64
	DMSO + MeOH	3429.5		DMSO - MeOH	4576.68
	DMSO + MeOH	3068.8		DMSO - MeOH	7246.38
	DMSO + MeOH	5084		DMSO - MeOH	8894.18
	DMSO + MeOH	4024.1		DMSO - MeOH	6781.78
	DMSO + MeOH	4082.7		DMSO - MeOH	11173.7
	DMSO + MeOH	4509.2		DMSO - MeOH	6373.38
	DMSO + MeOH	4532.1		DMSO - MeOH	14504.2
	DMSO + MeOH	3115.9		DMSO - MeOH	3002.58
	DMSO + MeOH	4029.8		DMSO - MeOH	11756.5
	DMSO + MeOH	549.9		DMSO - MeOH	11596.5
	DMSO + MeOH	2570.9		DMSO - MeOH	14700.4
	DMSO + MeOH	11190.1		DMSO - MeOH	8451.08
	DMSO + MeOH	9282.52		DMSO - MeOH	-1690.83
	DMSO + MeOH	10354.2		DMSO - MeOH	3921.6
	DMSO + MeOH	13295.4		DMSO - MeOH	2336.3
	DMSO + MeOH	12105.5		DMSO - MeOH	7034.6
	DMSO + MeOH	4557.3		DMSO - MeOH	4827.5
	DMSO + MeOH	7130.1		DMSO - MeOH	7066.3
	DMSO + MeOH	4817.9		DMSO - MeOH	3711.1
	DMSO + MeOH	2324.5		DMSO - MeOH	7141.9
	DMSO + MeOH	3824		DMSO - MeOH	14109
	DMSO + MeOH	5214.7		DMSO - MeOH	10074.5
				DMSO - MeOH	10364.1
				DMSO - MeOH	6495.7
				DMSO - MeOH	8487.8
				DMSO - MeOH	11207
				DMSO - MeOH	10105
				DMSO - MeOH	10426.5
				DMSO - MeOH	6650.8
				DMSO - MeOH	6837.6
				DMSO - MeOH	7206.2
				DMSO - MeOH	10859.8
				DMSO - MeOH	9529.6
				DMSO - MeOH	-3082.98
				DMSO - MeOH	6776.8
				DMSO - MeOH	9948
				DMSO - MeOH	3770.7
				DMSO - MeOH	5622.5
				DMSO - MeOH	4797.8
				DMSO - MeOH	5537.7
				DMSO - MeOH	6993.7
				DMSO - MeOH	9938.4
				DMSO - MeOH	8734
				DMSO - MeOH	8591.3
				DMSO - MeOH	12338.6
				DMSO - MeOH	12591
				DMSO - MeOH	10517.7
				DMSO - MeOH	8583.7
				DMSO - MeOH	9657.2
				DMSO - MeOH	12440.3
				DMSO - MeOH	10264
				DMSO - MeOH	8312.8
				DMSO - MeOH	7079.7
				DMSO - MeOH	6389.9
				DMSO - MeOH	2345.6
				DMSO - MeOH	3227.8
				DMSO - MeOH	8657.4
				DMSO - MeOH	-189.5
				DMSO - MeOH	6064.3
				DMSO - MeOH	404.2
				DMSO - MeOH	7526.7
				DMSO - MeOH	5626.7
				DMSO - MeOH	2701.33
				DMSO - MeOH	3017.13
				DMSO - MeOH	4011.43
				DMSO - MeOH	6752.73
				DMSO - MeOH	8742.43
				DMSO + MeOH	-739.7
				DMSO + MeOH	2549.8
				DMSO + MeOH	3566.9
				DMSO + MeOH	1972
				DMSO + MeOH	5227.2
				DMSO + MeOH	7667.5
				DMSO + MeOH	6901.7
				DMSO + MeOH	3527.4
				DMSO + MeOH	1868.4
				DMSO + MeOH	2062.7
				DMSO + MeOH	292.1
				DMSO + MeOH	-1250.1
				DMSO + MeOH	-599.8
				DMSO + MeOH	5533
				DMSO + MeOH	2717.9
				DMSO + MeOH	2509
				DMSO + MeOH	5277.2
				DMSO + MeOH	7347.2
				DMSO + MeOH	4682.6
				DMSO + MeOH	7938.8
				DMSO + MeOH	9348.3
				DMSO + MeOH	14675.4
				DMSO + MeOH	7126.8
				DMSO + MeOH	11293.4
				DMSO + MeOH	7830
				DMSO + MeOH	10042.5
				DMSO + MeOH	-563.4
				DMSO + MeOH	2499
				DMSO + MeOH	-5612.59
				DMSO + MeOH	5976.9
				DMSO + MeOH	4253.5
				DMSO + MeOH	5345.7
				DMSO + MeOH	4751.1
				DMSO + MeOH	8007.3
				DMSO + MeOH	14743.9
				DMSO + MeOH	7195.3
				DMSO + MeOH	11361.9
				DMSO + MeOH	7898.5
				DMSO + MeOH	2567.5
				DMSO + MeOH	-2086.3
				DMSO + MeOH	-5544.09
				DMSO + MeOH	4322
				DMSO + MeOH	7726.5
				DMSO + MeOH	3126.5
				DMSO + MeOH	6017.2
				DMSO + MeOH	6676.4
				DMSO + MeOH	2074.7
				DMSO + MeOH	2774.5
				DMSO + MeOH	3324.7
				DMSO + MeOH	7749.1
				DMSO + MeOH	300.6
				DMSO + MeOH	6251.6
				DMSO + MeOH	3362.2
				DMSO + MeOH	-1117.5
				DMSO + MeOH	2391.4
				DMSO + MeOH	15068.9
				DMSO + MeOH	-3600.3
				DMSO + MeOH	3401.8
				DMSO + MeOH	11122.7
				DMSO + MeOH	627.6
				DMSO + MeOH	11126.6
				DMSO + MeOH	8546.8
