# Supplementary material for: HIV-1 uncoating by release of viral cDNA from capsid-like structures in the nucleus of infected cells
Source: eLife. 2021 Apr 27;10:e64776. doi: 10.7554/eLife.64776 (PMC8169111; doi:10.7554/eLife.64776)
Supplement: Figure 4—source data 1. [file elife-64776-fig4-data1.xlsx]

## Sheet: data
	Figure 4 - source data
	Source data of Figure 4c. Given are the CA IF intensities of IN.SNAP objects at different localizations within the cell.				Source data of Figure 4g. Given are the CPSF6 and CA IF intensities of nuclear IN.SNAP objects treated with different PF74 concentrations for 2 h.						Source data of Figure 4h. Given are the CA IF intensities of nuclear IN.SNAP objects treated with 15 µM PF74 for different durations.							Source data of Figure 4j-k. Given are the CA IF intensities of IN.SNAP objects at different localizations within the cell after DMSO or PF74 treatment stained with a monoclonal antibody (71-31).								Source data of Figure 4o. Given are the CA IF intensities of IN.SNAP objects at different localizations within the cell.
																		DMSO				PF74
	cell-assoc.	NE	nucleus		sample	norm. CPSF6		sample	nucl. CA IF		0 min	5 min	10 min	30 min	60 min	120 min		cell-assoc.	NE	nucleus		cell-assoc.	NE	nucleus		cell-assoc.	NE	nucleus
	318.02	2536.26	1692.77		DMSO	5.29481		DMSO	-484.48		-484.48	3097.84	2548.62	2279.31	2890.46	3455.68		4225.26	4450.37	-469.355		1394.25	4761.66	3838.74		1652.16	4373.23	1807.29
	465.75	2726.9	2096.09		DMSO	4.68887		DMSO	-620.92		-620.92	3733.68	2980.83	1850.67	3432.46	3061.86		5710.19	4789	-313.476		196.68	1801.36	5439.65		2756.58	3137.4	1797.91
	444.24	1908.5	2543		DMSO	3.43017		DMSO	406.41		406.41	2968.94	3206.49	2422.36	3639.98	2959.03		2272.17	9721.11	-334.932		6589.94	6751.03	3239.54		2052.33	4517.98	2025.75
	1313.53	2813.53	1847.82		DMSO	4.39021		DMSO	-889.65		-889.65	3153.77	1436.51	3348.46	2859.24	2661.13		8424.5	4193.73	-686.077		6774.54	5307.71	4622.54		-398.479	3386.38	3778.29
	373.71	1857.13	2961.24		DMSO	5.08988		DMSO	-859.35		-859.35	2579.18	2749.17	2481.82	4863.78	3483.38		2639.14	2350.42	195.044		11412.4	6464.33	5885.8		3349.89	3410.19	3386.2
	469.28	1938.94	2364.86		DMSO	5.85994		DMSO	187.15		187.15	2612.01	730.28	1409.26	2380.11	2256.83		-354.962	3507.55	1503.18		4497.9	8635.37	3566.82		2190.85	4802.89	3519.79
	1808.66	923.63	1950.05		DMSO	3.93783		DMSO	103.95		103.95	3654.65	3397.81	2995.37	3646.93	2736.06		129.844	8151.07	-326.88		1224.21	9537.27	4215.31		2223.24	991.043	4003.36
	1439.73	1325.9	2998.2		DMSO	4.78234		DMSO	253.21		253.21	4529.21	3621.72	2919.94	2480.18	3754.52		7847.53	2227.38	216.966		4869.52	8369.93	5393.63		4051.31	6008.28	3529.68
	1088.74	2895.16	4155.84		DMSO	4.68759		DMSO	165.81		165.81	4160.6	4031.51	4027.26	2036.39	3895.27		2074.34	-1112.91	-765.123		7007.48	-18.7885	7868.04		2930.43	4632.99	1716.59
	550.46	3129.97	2393		DMSO	5.76041		DMSO	479.08		479.08	2862.58	3193.11	3386.64	3630.67	3111.29		1528.81	-287.337	-1410.93		514.058	2822.3	4137.09		3544.02	2933.29	2618.13
	614.83	3580.56	3048.93		DMSO	2.99839		DMSO	52.09		52.09	3238.09	1735.59	3319.39	2790.35	2303.91		5328.03	-234.55	-32.5681		8640.18	6865.11	4734.78		1810.68	2236.61	2207.61
	729.22	3797	3506.29		DMSO	5.80631		DMSO	7.74		7.74	2797.2	2760.87	2674.68	3847.01	3509.91		11242.9	4039	-465.484		3345.14	5230.6	4882.87		4526.74	1060.87	3969.34
	416.86	4839.17	1669.78		DMSO	3.52504		DMSO	129.17		129.17	148.49	2777.93	2940.53	3848.59	4129.32		2604.44	2908	-1374.18		-1697.5	4693.54	5925.1		1098.21	1974.05	2956.34
	695.83	1374.46	1660.43		DMSO	3.29768		DMSO	-60.77		-60.77	1779.87	1285.82	3400.41	3559.5	1660.99		5154.96	1568.8	-1325.48		8929.84	7123.84	6276.38		1368.87	3976.05	3095.73
	4004.24	4437.05	5582.4		DMSO	2.90101		DMSO	-160.49		-160.49	601.18	1665.17	4745.52	3536.76	2404.91		783.131	6028.41	-130.009		6308.84	3158.41	5285.09		4817.87	3458.64	1883.69
	858.4	4950	3082.12		DMSO	3.33927		DMSO	-46.04		-46.04	979.99	2940.05	3022.67	2180.42	2954.46		3160.38	4401.52	1009.02		4655.74	3428.58	9626.41		4057.3	2413.89	3217.48
	2186.04	2122.43	3094.88		DMSO	2.77228		DMSO	119.47		119.47	713.77	2227.08	3117.17	2707.59	2146.85		-275.485	3701.95	398.053		6060.83	4585.87	4133.04		4116.48	4385.62	1978.04
	805.92	1035.14	2606		DMSO	2.15465		DMSO	727.2		727.2	1199.68	588.43	2647.2	3017.9	2009.24		5002.21	6978.6	-1252.87		8030.58	3023.08	4122.43		5220.18	1551.11	3235.84
	471.5	460	2554		DMSO	2.50468		DMSO	285.37		285.37	1727.05	887.7	2070.01	3353.71	3818.94		-481.333	5927.53	-648.552		9207.41	4893.93	1330.59		1667.37	3761.05	1540.39
	2297	4899.89	2620.89		DMSO	2.54457		DMSO	739.35		739.35	649.8	1279.42	3750.73	4011.21	1822.25		1143.69	7002.35	-1351.76		132.411	4.10086	6365.44		1228.87	1855.47	3058.19
	1069.14	6189.44	3046.43		DMSO	2.88558		DMSO	221.38		221.38	1188.99	635.57	2943	2483.63	3506.07		8120.5	9615.11	1020.24		2003.6	5634.05	1068.25		3424.9	2375.98	4696.59
	1736.73	3537.7	3771.1		DMSO	3.00387		DMSO	-270.82		-270.82	390.65	1264.52	1911.83	2224.14	2388.61		6172.21	4833.84	179.826		-1464.95	4726.96	1168.25		1567.94	1021.23	4738.49
	990.45	2422.04	2786.68		DMSO	3.19741		DMSO	64.06		64.06	1059.8	1056.14		3612.99	2612.89		8426.14	5068.55	-478.045		4563.82	5595.69	1304.96		2984.01	385.5	4362.91
	603	6272	2841.07		DMSO	2.71905		5 µM	534.47			1194.48	5097.19		3761.56	2745.42		3724.41	3944.98	423.544		1810.42	2690.19	3693.93		1473.87	5497.68	3503.49
	1482.07	1189.76	2738.94		DMSO	2.89441		5 µM	-37.91			1261.3	5736.19		4414.07			2552.71	3179.23	-339.872		5586.6	3513.32	2532.85		1108.66	5591.2	5515.49
	1252.78	470.26	3272.03		DMSO	6.76451		5 µM	1322.49			2791.82	2810.02		2784.84			3227.28	5657.15	-1134.01		5731.4	3542.6	4272.13		-948.127	1999.42	4431.21
	1319.17	2476.24	2872.04		DMSO	5.3652		5 µM	534.21			1845.31	2455.87		4209.97			-856.662	2228.27	388.138		3830.73	829.879	6250.93		-260.056	4770.52	3765.22
	1539.5	3113.6	2126.8		DMSO	5.96835		5 µM	146.69			1545.02	7245.69		2748.34			6528.28	796.52	-159.809		3172.79	440.498	2652.31		6702.58		2828.63
	3797	6632.9	2048.61		DMSO	5.61973		5 µM	-84.03			1646.04						5601.77	5950.39	-594.045		3708.66	922.818	6861.79		3113.37		3462.28
	340.29	6260.27	3831.75		DMSO	5.2186		5 µM	-214.77			1002.19						4641.32	3194.65	38.6519		589.922	4439.6	4160.21		2076.37		2896.53
	354.5	3122.5	2656.2		DMSO	6.91788		5 µM	-128.19			252.68						-1070.36	3642.77	255.892		705.768	3855.52	4451.6		2225.25		1444.38
	2128.71	3383.27	2621.79		DMSO	9.43337		5 µM	465.35			1028.02						4241.26	3999.6	702.286		8806.23	6696.12	5490.94		592.043		2922.61
	1143.8	1641.25	2473.44		DMSO	9.65871		5 µM	826.9			2160.97						3146.36	3849.7	290.584		7371.4	3614.28	1780.86		2998.32		3323.78
	921.97	2393.2	1905.86		DMSO	11.2672		5 µM	1290.96			1911.2						6055.86	1001.46	558.197		3044.6	3312.23	3865.79		3098.74		1693.29
	2289.5	1643.85	3714.84		DMSO	7.81714		5 µM	3381.18			1417.68						6602.32	2428.71	346.048		4990.75	4589.25	4741.78		5006.98		1266.21
	572.85	2546.38	2545.33		DMSO	5.76518		5 µM	1558.66			813.14						-19.875	3023.89	-145.265		4885.15	3309.64	6602.87		2228.32		4321.7
	2099.47	1353.56	4076.75		DMSO	6.68706		5 µM	2570.73			1232.9						6586.73	3775.1	151.37		4262.1	965.933	5879.6		4443.9		5107.8
	2246.19	3634	2622.39		DMSO	8.32383		5 µM	1683.36			960.37						6557.17	4633.63	246.765		652.601	2852.6	4535.85		4361.32		4381.1
	3169.3	2605.88	4649.23		DMSO	8.65235		5 µM	2077.97			1666.84						4944	3429.47	252.654		3174.13	7154.68	3618.47		6685.26		6497.3
	1489.92	4501.73	1952.3		DMSO	6.58471		5 µM	2726.09			1233.98						6057.28	3255.16	234.205		4119.89	1517.94	5855.84		4374.45		2691.5
	608.29	4179.3	2325.85		DMSO	1.81583		5 µM	1794.49			395.7						4674.46	2368.93	308.009		3847.91	3792.41	3916.03		1909.95		3105.9
	1074.55	1271.55	2488.03		DMSO	3.54061		5 µM	571.45			432.04						2159.86	1873.3	485.444		2507.39	1730.82	4587.61		8575.95		6313.3
	2835.9	1686.06	2050.43		DMSO	5.66403		5 µM	308.68			2095.57						3183.53	-470.4	899.08		3539.57	2009.48	4220.58		3553.58		5088.3
	3343.29	1672.08	4626.44		DMSO	5.26934		5 µM	239.24			3613.65						5570.79	1393.58	403.541		2170.36	2751.54	4283.14		3302.95		1037.39
	3658.62	4172.85	2403.94		DMSO	5.13199		5 µM	524.01			253.3						7936.04	2990.79	-290.137		5966.91	-174.548	3085.83		2736.28		2751.7
	732.4	3357.6	4066.12		DMSO	6.99723		5 µM	735.52			-66.99						5259.23	2515.33	470.278		-1232.4	888.885	3081.68		3697.33		4208.77
	729.52	4585.28	2591.81		DMSO	4.06851		5 µM	50.56			602.69						4575.36	1453.63	-258.69		2204.66	6413.59	1634.15		1551.8		4046.7
	988.67	5335.31	2591.05		DMSO	4.16056		5 µM	594.41			271.55						5231.32	2983.83	-35.2323		5288.33	2552.38	2935.67		1101.08		3396.76
	248.5	4309.2	2551.86		DMSO	3.23956		10 µM	1315.64			186.64						7734.83	3079.62	469.823		2061.17	-173.694	3915.95		4743.78		2457.17
	630.67	2488.11	2255.48		DMSO	5.42691		10 µM	2745.38			-26.35						5864.42	2183.22	-219.309		5946.98	4368.38	4544.25		2109.84		1873.14
	513.2	3374.96	1711		DMSO	5.32925		10 µM	3805.68			269.91						10773	4599.77	87.4178		9971.4	1438.76	4745.93		3988.83		4572.29
	1747.33	2238.33	2372.91		DMSO	4.2536		10 µM	5862.58									5366.38	4939.28	-30.1393		8575.95	5831.88	3944.38		-261.84		1896.75
	934.32	6949.43	2360.38		DMSO	5.24845		10 µM	1094.18									194.347	2573.11	-325.345		1694.28	7171.43	4179.06		748.91		2172.72
	2552.38	4780.15	2936		DMSO	3.98803		10 µM	2457.68									6781.34	2709.65	519.741		4113.93	5621.7	3594.22		149.32		2750.39
	144.4	3362.48	4433.95		DMSO	5.18518		10 µM	4414.38									3447.81	3802.5	-68.7523		5511.71	789.202	3421.14		6654.14		2622.13
	198.53	3522.03	4211.98		DMSO	5.90964		10 µM	4110.58									8601.91	3693.54	310.503		4667.15	2286.2	3880.67		2685		1124.66
	832.15	3126.81	4276.73		DMSO	3.10563		10 µM	3028.48									9453.23		332.358		4346.25	3791.12	759.563		1454.35		3119.07
	3285.52	1648.55	3926.46		DMSO	5.12221		10 µM	3206.98									2027.74		-47.9154		74.7443	4950.43	3033.45		1977.57
	2275.6	2603.4	1692.38		DMSO	3.7463		10 µM	5122.08									1091.42		-22.191		3951.95	3446.5	3843.02		1246.71
	2989.44	4806.21	5458.53		DMSO	3.83895		10 µM	7523.08									949.957		403.559		4131.69	4359.92	1900.72		68.16
	413.16	2935.73	3012.56		DMSO	2.43077		10 µM	496.05									-798.363		631.092		4446.91	3458.57	4008.76		2852.34
	619.57	2918.42	3992.19		DMSO	4.20711		10 µM	950.3									784.723		15.2093		2897.75	4344.86	3052.96		1397.49
	588.55	5182.5	3878.76		5 µM	2.8217		10 µM	1984.94									5536.02		61.7535		3753.96	2814.46	3522.05		-2279.49
	654.67	2158.41	2785.51		5 µM	2.29689		10 µM	2089.36									-2891.18		-327.416		2662.23		2742.86		5702.8
	622.32	1669.03	3607.88		5 µM	2.60726		10 µM	966.43									-2161.19		-405.718		2442.94		4030.01		3586.2
	2282.13	1531	2486.6		5 µM	2.73418		10 µM	2123.06									-1046.94		-792.692		5648.36		4885.2		6343.7
	2453.53	7572.95	2061.07		5 µM	2.75767		10 µM	5656.64									2611.8		-215.032		-259.066		3875.73		577.07
	2623.43	4326.47	2133.02		5 µM	3.84247		10 µM	851.57									123.461		-565.666		7097.67		7116.63		-1303.78
	320.74	4284.33	4177.39		5 µM	2.61392		10 µM	179.8									709.103		-1093.83		6877.52		5112.03		5597.4
	1402.97	2291.95	3018.22		5 µM	2.8011		10 µM	251.88									-1174.54		-105.203		58.2056		7813.5		3804.5
	509.81	3187.91	4506.08		5 µM	2.7675		10 µM	615.77									-2192.35		422.341		6426.1		4090.46		3979.6
	1296.88	4136.06	1252.11		5 µM	3.43761		10 µM	203.28									585.048		10.9119		3217.36		4149.45		1168.6
	714	2598.53	3651.32		5 µM	2.82165		10 µM	231.36									227.569		-29.2866		2650.6		5106.94		8286
	419.38	4011.25	3398.92		5 µM	4.02151		15 µM	3243.18									1924.17		693.984		3635.65		3599.77		2315.09
	363.25	6604.6	4538.56		5 µM	3.49228		15 µM	2781.89									6101.97		228.155		950.588		4010.99		5952.2
	2595	2227.09	3823.93		5 µM	2.72642		15 µM	5341.91									11097.5		-199.437		5476.96		4106.01		7184.7
	526.73	4818.33	1347.3		5 µM	2.65219		15 µM	3822.31									4360.46		-150.329		4798.2		3752.9		3551.61
	791.96	7134.68	2773		5 µM	2.48809		15 µM	6982.61									5512.89		-861.571		6975.67		2768.96		2982.94
	624.83	3104.27	3176.41		5 µM	2.78949		15 µM	7734.41									-1523.68		103.835		-866.719		3993.44		2593.38
	407.25	6401.22	2837.72		5 µM	2.37581		15 µM	3921.61									2751.64		-994.696		2709.3		1525.67		2507.47
	2256.25	3405.57	5864.3		5 µM	3.03274		15 µM	4630.61									5333.04		0.859463		4601.59		3254.74		4607.86
	1660.13	820.87	1916.81		5 µM	3.5758		15 µM	3894.61									4665.21		-306.415		-1630.2		1288.99		4443.66
	2616.22	2115.66	2035.09		5 µM	2.95609		15 µM	3456.77									2184		-572.286		1697.18		1672.26		2938.15
	1615.21	1502.98	1487.85		5 µM	2.80603		15 µM	3775.31									5468.2		354.73		2105.54		3055.24		2584.2
	761.36	2298	1216.13		5 µM	3.16155		15 µM	3571.51									1528.1		287.593		-699.65		3460.59		4511.8
	474.75	1644.64	1025.31		5 µM	1.7888		15 µM	4444.31									-1430.87		-236.599		604.985		3297.61		2772.3
	495.69	1624.83	1578.39		5 µM	2.02444		15 µM	2992.05									2367.02		14.9483		3029.82		1262.49		3751.19
	2282.04	2431.3	1412.06		5 µM	2.38681		15 µM	3763.06									4078.81		-384.932		4074.04		2307.85		5111.26
	1961.4	1238.28	4477.43		5 µM	2.28928		15 µM	3023.76									882.513		-100.663		3015.34		3380.37		8091.37
	922.81	9547	4463.31		5 µM	1.90819		15 µM	2242.95									5205.21		-7.48412		5549.79				3739.01
	1646.2	1718.2	3613.28		5 µM	1.70776		15 µM	2437.57									275.103		-149.728		5272.61				2928.74
	1422.13	1055.14	7966.79		5 µM	2.06143		15 µM	2919.77									11108.5		-377.835		-521.558				2593.74
	1362.8	2522.03	2863.21		5 µM	1.84013		15 µM	5575.61									2157.58		304.48		8870.35
	701.98	747.83	925.5		5 µM	1.39576		15 µM	4776.09									3434.05		-322.58		7975.9
	1592.45	2598.05	3885.27		5 µM	1.81712		15 µM	3619.11									1805.33		-255.455		6791.74
	927.76	904.13	4028.5		5 µM	2.0482		15 µM	2864.26									-612.73		432.318		123.73
	1521.9	806.32	2585.17		5 µM	2.04213		15 µM	3770.26									-2201.56		903.583		4481.9
	1863.81	1852.17	2449.54		5 µM	2.28361												4075.93		138.192		2491.44
	2476.4	2574.48	3507.58		5 µM	1.96663												3616.95		141.999		3434.84
	1182.87	394.63	3780.86		5 µM	2.20924												5015.97		1088.31		4266.19
	3254.18	665.28	2607.09		5 µM	2.15759												5107.94		-991.829		7838.19
	1623.38	1720.86	1899.81		5 µM	2.30117												1662.57		-134.44		2531.95
	948.94	2058.84	2559.65		5 µM	1.80884												-2435.78		-979.26		4879.12
	348.33	1457.25	3528.57		5 µM	2.32874												1958.67		-534.579		2481.73
	380.33	2741.72	2064.9		5 µM	1.77345												2581.77		740.133		2772.72
	1600.75	2967.29	2192.71		5 µM	2.80788												3876.9		159.235		1549.15
	1027	914	3000.92		5 µM	3.77769												4115.49		551.296		8916.18
	1202.57	779.5	3885.37		5 µM	3.54233												4371.69		-352.107		-1306.75
	453.18	822.93	2670.7		5 µM	3.77468												5285.96		499.721		6709.41
	1635.59	871.26	4164.74		5 µM	2.49424												4318.29		196.732		4788.65
	527.83	957.04	3492.56		5 µM	3.13634												-1545.83		205.198		7618.26
	365.5	696.6	4652.8		5 µM	3.38067												6057.23		-342.845		8269.16
	451.17	1662.5	2575.29		5 µM	3.57169												-215.689		219.843		5649.6
	2213.09	711.56	1443.11		5 µM	1.74426												4771.06				-903.62
	783.43	741.34	1796.76		5 µM	3.67658												7073.69				672.431
	494.96	1017.37	2192.05		5 µM	3.36397												225.081				4618.67
	195.7	887.93	2812.87		5 µM	3.49657												6945.14				6058.93
	275.41	729.82	5733.53		5 µM	3.26812												-943.339				7613.43
	686.11	813.03	5759.2		5 µM	4.27056												328.64				5807.62
	2788.89	812.8	2011.76		5 µM	3.96417												3808.21				-231.831
	87.6	805.29	3792.4		5 µM	3.81826												-810.07				7256.43
	2258.69	856.67	3186.67		5 µM	3.34387												4349.44				2185.26
	2070.43	270	1958.33		5 µM	3.58824												-536.901				2028.6
	1908.58	1658.92	2482.5		10 µM	3.33785												626.561				6783.97
	1527.73	762.44	2574.92		10 µM	2.70319												5418.38				11617.8
	2309.52	5102.61	3090.78		10 µM	2.27659												2872.93				6919.59
	4110.86	4731.31	3536.83		10 µM	2.64947												4675.76				3525.77
	1156.81	1829.84	1591.17		10 µM	2.66928												-696.511				4242.91
	1575.23	1603.81	1952.22		10 µM	2.43503												2923.1				191.465
	2416.83	1606.66	2108.53		10 µM	1.84216												375.203				681.836
	1524.7	1049.18	6743.02		10 µM	1.87667												5382.77				-182.418
	2919.72	3709.54	2465.88		10 µM	1.92328												795.507				461.223
	1039.25	1341.81	3367.91		10 µM	2.00599												3318.74				6232.79
	4014.33	2866.3	1700.82		10 µM	1.65392												4130.9				463.819
	1467.98	1627.11	1792.2		10 µM	1.4049												316.079				5505.62
	1536.89	1861.42	4269.13		10 µM	1.47528												6711.8				4485.4
	1541.57	1535.14	2892.13		10 µM	1.71939												3230.72				6167.65
	1721.84	1016.92	6327.57		10 µM	1.13683												579.173				5203.98
	1301.07	2122.65	2633.17		10 µM	1.29322												3363.43				-928.025
	2490.73	4261.05	4120.38		10 µM	0.891015												4002.39				5623.41
	2645.87	877.25	2741.95		10 µM	1.47452												1514.38				3199.1
	1163.56	994.2	5996.08		10 µM	1.03286												1757.09				8692.18
	729.25	1132.55	6991.5		10 µM	1.55944												4671.65				5342.32
	1705.32	7415	2310.38		10 µM	1.32045												2285.57				258.547
	1071.4	774	1564.93		10 µM	2.06846												1520.97				5992.35
	839.83	1420.46	1434.5		10 µM	1.78824												753.79				4436.17
	178.17	567.47	3375.4		10 µM	1.94247												3450.27				4980.98
	3624	969.38	3282.87		10 µM	1.91415												1082.14				3733.06
	6101.05	392.17	2338.07		10 µM	1.25492												1854.56				-1733.54
	2048.73	3109.73	2639.29		10 µM	1.9648												908.701				5251
	3091.84	2676.5	3380.14		10 µM	1.04969												167.377				1523.36
	2889.85	3554.44	1001.32		10 µM	2.02817												2793.3				5265.17
	2979.8	330.5	1032.6		10 µM	1.676												692.281				2418.64
	3015.14	1154.77	1970.83		10 µM	1.88427												5521.37				605.083
	1369.45	899.47	3870.82		10 µM	0.98274												1767.76				6147.78
	1442.26	355.14	3621.49		10 µM	1.94761												1903.43				3622.8
	3402.2	396.11	4418.21		10 µM	1.69477												285.576				5538.39
	2339.4	1482.5	2277.1		10 µM	1.68032												7127.77				1988.74
	851.43	2239.31	868.86		10 µM	2.09956												-1119.06				3478.8
	894.08	3389.83	7601.35		10 µM	2.1716												1795.31				-1693.59
	1502.15	4601.59	6437.2		10 µM	1.72399												2319.94				2155.66
	806.91	4256.9	7231.54		10 µM	2.00502												2143.26				11202.8
	1765.95	3916.96	7432.26		10 µM	2.13471												3191.42				3349.5
	1193.6	2325.24	2262.38		10 µM	1.89687												2821.4
	1561.29	1722.49	4394.56		10 µM	2.31031												-640.023
	648.45	3221.55	931.45		10 µM	1.80719												2998.02
	892	5963.48	835.67		10 µM	2.07895												958.449
	380.6	3850.8	2917.38		10 µM	1.72295												1347.74
	629.6	1945.4	2503.76		10 µM	2.75269												8091.6
	2490.71	3255.78	3257.88		10 µM	2.31825												323.984
	2082.15	298.38	3917.26		10 µM	2.05921												1451.98
	1421.58	259.3	2367.22		10 µM	2.14927												-350.4
	1297.75	249.89	2333.4		10 µM	2.30112												2354.13
	1958.07	1328.45	4975.13		10 µM	2.0917												3993.23
	291.84	985.95	2736.64		10 µM	2.48497												4169.2
	1530.92	377.73	1690.29		10 µM	2.52457												3932.36
	4046	780	5099.22		10 µM	1.29644												3744.66
	1961.66	1680.22	3045.36		15 µM	1.18312												1784.45
	1697.92	2421.71	4725.4		15 µM	1.31129												3615.33
	1024.25	968.47	1564.33		15 µM	1.14841												1403.78
	1835.98	2096.2	2646.88		15 µM	1.04951												-2030
	2146.27	1977.03	3178.5		15 µM	1.51208												2828.99
	2538	4246.02	5066.79		15 µM	1.15243												3297.76
	410.94	1770.36	2613.62		15 µM	0.89346												4799.94
	4277.43	2013	1214.13		15 µM	1.46595												4012.11
	329.63	5221.61	1381.86		15 µM	1.35093												3418.04
	2171.64	6263.51	1858.63		15 µM	1.19053												4342.09
	908.89	3460.11	1750.59		15 µM	1.28308												7326.09
	1473.68	2087.01	3073.15		15 µM	1.14251												4699.89
	7429.42	3047.5	2883.04		15 µM	1.30799												1451.71
	990.6	1318.81	3027		15 µM	1.28563												3251.54
	1217.11	1835.2	2377.86		15 µM	1.48529												4526.36
	175.3	2624.32	1241.64		15 µM	1.42685												3747.71
	8587.03	2324.84	2984.23		15 µM	1.02409												4451.05
	2201.01	269.2	4852.31		15 µM	1.52076												1377.02
	4181.5	2744.3	527.43		15 µM	1.37885												3194.68
	2353.85	838.68	2400.83		15 µM	1.18113												4843.31
	544	1079.63	1767.15		15 µM	1.4087												3199.9
	2617.63	1333.58	1735		15 µM	1.41344												6922.66
	2730.94	4471.05	6690.64		15 µM	1.4995												2680.31
	1521.29	3503.88	4205.38		15 µM	1.61299
	2465.16	3556.86	3895.44		15 µM	1.35196
	329	1520.46	3436.78		15 µM	1.51156
	1775.05	2564.33	3968.37		15 µM	1.27158
	3017.41	4077.7	2339.31		15 µM	1.14058
	2588.55	2202.5	1839.08		15 µM	1.18293
	2764.12	4264.33	2933.53		15 µM	1.05941
	2901.79	3201.67	928.83		15 µM	0.606288
	1301.35	1960.04	5515.19		15 µM	1.35211
	2163.84	2560.96	2645.65		15 µM	1.23298
	757.55	784.56	2636.72		15 µM	1.33464
	3261.17	3339.2	1584.73		15 µM	1.15923
	2760.47	4812.73	1114.28		15 µM	1.21885
	1225.88	3018.44	2094.47		15 µM	1.41879
	1179.5	6341.94	2258.71		15 µM	1.22663
	2183.39	2173.57	2437.45
	235	1999.22	3426
	603.15	1127.13	1858.75
	328.47	884.45	2529.04
	840	2496.68	5213.02
	1077.26	2342.79	2053.67
	971.81	5831.18	2551.23
	1202.29	2182.91	4980.5
	2082.42	3632.91	1246.51
	1924.67	2325.09	2987.4
	252.8	1300.21	2153.28
	3030.88	7157.24	3045.25
	434.31	4242.89	1945.06
	2483.09	1650.78	2821.92
	1582.92	1750.09	2060
	4024.03	5244.65	1766.06
	330.08	5361.52	4442.39
	2085.18	2019.74	924.04
	1120.17	9139.56	7515.93
	1094.1	2000.69	2501.92
	1620.79	2420.47	1570.61
	451.22	1131.57	2926.6
	1759.14	6919.88	4418.71
	411.2	1664.72	3390.44
	1232.1	3603.09	1685.2
	1752.55	4973.77	4249.13
	3137.22	909.27	1685.75
	2082.1	2461.33	1671.88
	364.38	4965.79	3191.08
	512.93	365.8	2173.84
	3168	1214.67	3497.88
	1071.3	3155.38	3878.79
	2364.41	10554.9	2294.13
	327.25	5229.8	2181.91
	270.76	7528.58	2539.93
	1371.9	4621.66	2637.5
	2455.38	6075.3	1940.2
	403.39	11904.2	2135.07
	828.13	2524.83	4826.88
	3603.19	6686.04	2284.43
	767.13	1539.17	2667.78
	2140.15	12064.3	2039.04
	6359.76	5200.63	2504.83
	1086.1	2150.11	2448.9
	841	3469.61	4023.69
	1975.07	2091.97	2975.26
	2119.2	573.58	1737.72
	6583.26	1858.87	1437.82
	2596	3462.47	4744.27
	179.5	3764.13	1757.33
	1107.12	4015.13	3612.2
	4985.92	1121.63	3638.08
	3136.03	4142.11	1381.5
	3330.33	2536.44	2962.21
	708.92	3116.71	1050.57
	1122.26	4987.43	2062.43
	1902.57	3363.67	1814.66
	2303.24	348.5	6067.37
	4461.74	475.6	1784.77
	755.25	1933.59	6243.98
	8404.46	489.67	1756.2
	853.31	579.78	4287.84
	4923.32	1845.65	5268.49
	1845.66	343.69	5149.97
	3697.47	1432.99	6425.41
	3782.65	1190.38	5478.18
	1185.86	662.38	4027.81
	1541.65	1016.88	3994.29
	2812.65	2845.56	3596.53
	4226.54	789.41	2412.68
	1007	4513.45	2606.54
	2144.02	642.5
	2288.11	881.72
	1245.92	631.17
	355.27	531.61
	857.27	3543
	1503.26	506.52
	306.06	2539.76
	1195.58	384.79
	1512.83	724.42
	2527.9	848.68
	921.1	2857
	2490.67	735.93
	2761.63	279.2
	4031	282
	2916.08	593.28
	868.7	353.84
	1090.36	949
	303.33	537.42
	383.67	540.14
	406.93	1012.83
	3473.05	1401.22
	1417.9	3735.09
	865.71	1928.13
	3492.86	1779.22
	1896.75	218.6
	2582.39	148.8
	846.07	775.6
	1915.5	919.8
	595.67	785.04
	1055.61	738.4
	1142.47	1551.5
	2564.23	1884.74
	3417.76	2765.33
	354.38	1873.91
	824.94	3806.57
	232.74	353.68
	382.36	1160.77
	2554.5	1241.81
	4357.04	1078.42
	484.5	403.63
	3139.67	547.4
	1305.06	694.06
	899.6	566.45
	5154.09	2036.86
	1473.97	648.31
	4456.29	7620.8
	2627.38	749.38
	5290.54	338.83
	489.83	1014.13
	522.26	152.4
	3178.36	285.4
	3568.15	1209.52
	172.59	803.79
	126.28	826.66
	3473.72	2177.5
	500.5	781.23
	296.83	734.86
	1939.64	318.05
	2803.18	2115.72
	3698.69	4456.05
	6093.69	9712.6
	1958.46	1198.33
	9216.68	665.19
	1751.5	307.09
	1325.69	1624.24
	1403.17	1219.71
	3727.15	1677.62
	4515.75	4608.88
	4294.67	2160.65
	1440.7	589.43
	2281.75	1411.43
	2710.76	548.4
	9988.2	989.16
	3728.15	2976
	1557.06	1605.21
	10926.6	1761.59
	1127.57	3003.7
	1047.9	1086.84
	1322.65	1559.42
	3377.96	260.27
	249.86	3869.97
	2861.9	2053.77
	1348.88	608.16
	2581.87	1477.39
	1921.73	1554.2
	4975.05	2200.38
	2466.02	223.88
	1361	2064.82
	3289.61	2091.83
	2078.5	1377.35
	2759.44	2092.58
	682.4	2686.63
	2220.23	2120.6
	1165.99	1218.83
	706.17	2728
	2291.58	697.8
	2286.77	1546.03
	2868.8	2565.79
	2471.71	561.38
	4374.21	1908.6
	262	957
	847.71	1300.68
	421.84	2193.67
	523.88	341.09
	2047.63	510.95
	296.67	493.71
	2691.44	3379.69
	308.23	2849.58
	4006.64	4228.07
	498.6	2466.51
	3129.75	3951.72
	7219.94	3154.75
	3601.21	2857.08
	1822.63	1389.8
	2228.33	1342.07
	1479.5	333.71
	2312.29	1517.48
	113.75	963.22
	1373.98	1668.96
	2512.26	1251.05
	4745.57	305.8
	3875.35	1751.3
	4183.29	1074.31
	120.82	804.41
	4632.54	204.71
	1461.56	1564.99
	6183.31	4089.44
	1098.33	2691.06
	2415.51	3256.03
	1076.92	1328.21
	3202.39	1808.21
	4293.41	900.14
	4833.12	1269.96
	1931.63	1060.71
	2275.14	486.55
	1186	2657.74
	2306.96	1395.26
	1153.33	4351.21
	638.65	2838.63
	1580.31	453.27
	647.9	4426.69
	255.37	2431.36
	923.7	1571.55
	2177.27	1440.85
	1774.65	4257.56
	1703.24	921.8
	1562.4	1870.1
	1002.02	1245.98
	1116.93	3710.3
	2530.1	473
	1508.87	1963.6
	2046.05	3908.06
	1782.84	880.39
	209.8	2824.95
	1217	1716.09
	1031.86	779.82
	4261.82	3426.74
	362	2140.61
	4473.36	2301.12
	958.01	954.63
	2103.87	1898.34
	1963.45	2931.55
	244.2	2906.64
	133.78	472.05
	1024.48	8672.18
	207.21	3091.52
	2700.28	3239.88
	1645.83	3889.29
	3215.67	2512.8
	908.17	1203.85
	1938	2956.68
	4379.33	6011.29
	1982.71	2604
	2446.88	5649.94
	3632.29	2384.03
	151.42	3086.58
	3954.8	1208.34
	4240.44	6355.45
	845.63	383.02
	3026.2	1597.44
	7695.1	4314.52
	5702.87	4071.93
	5369.42	3434.27
	2898.76	1235.68
	1832.54	3169.8
	706.32	1102.93
	7475.61	2931.03
	1843.83	5131.07
	1512.36	1148.92
	14027.3	3558.67
	691.83	942.59
	1115.2	1636.15
	3836.65	3804.09
	979	2692.21
	10164.2	1433.33
	1321.13	2755.4
	1029.76	3797.85
	1321.64	3034
	2234.33	868.8
	3189.29	2501.33
	2789.61	2370.79
	4439.84	3489.13
	2040.42	1696.82
	1716.77	4118.1
	1899.2	3104.89
	1649.89	5403.6
	2159.16	3809.88
	2344.29	2746.78
	244.48	2754
	217.24	1145.73
	1240.17	2230.43
	651	837
	2306.43	4649.44
	1411.55	3145.91
	3110.75	4247.67
	542.95	1595.79
	5137.9	1133.47
	3036.27	1587.17
	686.5	1189.15
	3657.02	2207.63
	3351.57	3344.25
	2136.88	10701.2
	534.43	743.6
	622.52	604.5
	945.4	1455.64
	2918.59	3719.05
	1245.43	1087.45
	1451.63	2581.78
	1513.35	3523.19
	1174.33	3570.98
	3281.82	1605.64
	967.9	665.6
	729.5	4317.89
	1383	3285.88
	1970.75	4300.72
	889.3	3212.18
	1139.17	2525.2
	326.98	2779.36
	1192.5	2209.43
	974.5	2237.91
	897.88	2006.67
	221.33	11158.6
	2534.27	2230.78
	2297.38	3700.43
	1294.96	599.44
	1110	2679.9
	5173.67	2148.33
	2395.59	7439
	2626.03	2634.45
	1751.75	2512.55
	3163.21	431.2
	192.79	375
	438.87	404.09
	2017.65	2270.07
	3512.63	1996.93
	1051.83	310.11
	1588.77	1237.85
	5996.73	605.36
	3088.28	560.61
	2712.06	1311
	618.83	387.29
	2614.49	348.92
	3060.83	1392.21
	2843.22	2755.56
	1959.26	492.06
	3977.5	2474.22
	3153.92	393.43
	709.43	406
	1909.56	377.78
	4883.2	2172.98
	792.84	2704.17
	7242.29	1433.47
	1233.63	2012.86
	1070.25	402.5
	5800.22	4203.57
	1103.33	510.63
	734.2	571.25
	859.69	359.5
	804.13	946.45
	4461.1	3458.52
	850.49	352.56
	1819.25	324.5
	660.14	537.29
	3586.82	5586
	3534.26	2636
	3399.39	4366.77
	2292.69	2331.16
	1694	312.79
	2051.54	2031.67
	1784.2	1043.95
	2343.46	1396.79
	518.64	390.1
	3903.03	462.43
	1964	354.44
	1913.5	1884.33
	464.39	1648.12
	1840.1	584.76
	1830.13	2878.63
	960.23	2276.12
	3300.29	415.33
	1524.3	1716.25
	1186	643.53
	2869.08	505.61
	2217.38	1234.73
	638.89	192.33
	1125.73	767.58
	1900.43	2393.5
	546.2	5483.74
	3602.03	6274.28
	1153	3121.84
	2395.64	701.2
	5011.87	2266.84
	1303.13	3308.95
	1266.64	8148.16
	2171.2	4800.35
	1739.08	126.9
	700.07	2671
	128.56	1663.94
	5011.32	285.12
	1927.63	1723.5
	415.38	2092.79
	361.73	1972.3
	3971.3	1566.71
	951.89	2994.57
	768.24	798.73
	2023.33	2237.79
	2433.88	590.33
	273	689.68
	2835.85	5229.8
	2469.13	411.4
	2582.9	2600.33
	2792.9	444.22
	3701.01	2323
	1496.02	758.89
	950.51	545.6
	1361.58	1421.78
	1646.88	1178.79
	9050.88	2479.57
	428.1	513.9
	1661.83	285.29
	668.21	1492.78
	619.81	525.08
	2373	1377.75
	13430.1	4784.25
	11118.9	1198.03
	2972.81	245.8
	726.93	2529.98
	878.62	2094.76
	1064.32	1861.96
	4126.86	1775.82
	5717.88	1679.11
	844.84	3140
	1756.5	2308.65
	1527.63	1879.57
	2927.37	894.41
	2354.98	2682.67
	2643.91	566.82
	2752.24	2101.39
	519.06	5570.6
	2209.4	2114
	2788.57	5432.56
	1640.26	2415.2
	1450.99	4754.07
	1823.9	383.54
	1443.87	327.39
	2488.1	2748.86
	2014.33	1962.61
	1187.72	2073.88
	655.07	3054.1
	171.67	4012.6
	3660.04	4023.14
	3446.6	2196
	175.75	2070
	5085.57	4494.96
	1321.92	1309.75
	4171.8	2314.68
	589.1	1090.38
	1487.25	1768.07
	988.57	4118.69
	767.21	2046.61
	2715.42	3616.2
	325	3466.79
	1839.94	6667.05
	598.42	8259.73
	1158.62	1719
	2914.81	2511.08
	2615.32	18063
	1644.44	6536.58
	1013.44	1082.28
	1799.52	1158.05
	2190.75	3505.18
	1727.85	5082
	648.45	8479.88
	11070.1	3208.21
	1149.92	2953.03
	10805.9	2866.62
	5484.88	1915.6
	546.33	894.11
	231.23	1703.25
	2560.06	1559.1
	1523.58	1551.03
	1079.18	4901.19
	2513.12	2894.43
	1632.04	3545.13
	583	1324.24
	2462.63	2902.78
	2626.76	2753.76
	1138.79	4220
	5811.26	3339.37
	14712	2902.6
	2951.91	5550.21
	14012.4	2028.46
	1067.4	10372.8
	482.11	2127.45
	1617.35	1399.61
	5624.58	4446.77
	3669.84	3121.64
	518.65	848.46
	1146.45	5814.92
	2902.5	3865.78
	2388.72	2324.02
	399.08	1947.56
	2889.17	343.13
	1151.4	2375.69
	4117.27	876.98
	615.6	1485.48
	2672.81	3370.83
	3150.52	1038.38
	2601.23	5736.04
	1070.17	5796
	1302.02	3887.79
	2442.21	2518.63
	1029.67	147.86
	1039.67	3890.63
	1882.68	1035.6
	1061.32	1539.64
	640.88	2780.41
	1383.33	598.43
	3302.17	1144.29
	115.21	1051.2
	243.64	1570.15
	466.6	809.78
	827.45	1586.84
	4326.69	1993.33
	1820.24	2905.09
	1044.56	5876.63
	4632.59	2135.41
	2210.07	4000.13
	2670.47	2936.77
	3151.36	4191.19
	2215.52	1847.86
	951.71	2365
	2299.79	5533.89
	2427.46	11475.7
	9991.7	1304.35
	137.43	6858
	1787.2	843.45
	1508.25	9694.8
	1561.38	1028.88
	861.16	725.18
	5188.81	6575.39
	861.2	2413.08
	517.25	6669.78
	1300.79	5172.62
	2205.1	4471.27
	6023.71	1090.7
	803.45	1061.5
	969.4	4141.07
	6975.51	2446.09
	5498.18	1508.61
	3365.88	2792.71
	3044.55	2471.43
	1116.72	1494.28
	1748.94	916.93
	1316.83	982.17
	6555.27	1070.47
	4368.63	5135.6
	4045	4097.56
	7466.87	804
	6139.77	847.33
	2507.43	645.21
	1942.31	2587.81
	2251.86	934.56
	215.93	5468.32
	880.16	7368.85
	2843.26	6012.18
	2305.31	1005.55
	1801.86	3011.91
	4518.33	3703.42
	3396.68	3275.14
	1928.98	1114.73
	2611.25	8702.35
	134.38	969.51
	425.43	1906.27
	1893.64	1707.63
	2652.82	644.68
	1112.21	4424.5
	1761.21	2485.16
	2270.93	1820.3
	3771.01	993.28
	954.54	1039.15
	1321.44	1975.27
	1237.58	5510.78
	525.12	1695.83
	2316	1117.3
	2420.6	3196
	2692	7874.85
	2578.62	3511.37
	927.12	3990.47
	635.27	1454.33
	975.25	2850.81
	1016.29	2007.82
	497.17	2259.3
	898.14	3338.05
	1704.57	766.49
	1609.8	3482.54
	5513.91	262.38
	441.79	1812.53
	1587.93	2304.94
	1537.31	2745.5
	2315.53	4881.39
	784.79	2556.67
	743.65	243.7
	2827.94	947.93
	1594.29	767
	1788.79	3827.1
	3674.91	3991.86
	536.67	2126.86
	3120.05	1144.91
	1873.51	299.58
	2761.1	5378.97
	1492.3	5434.35
	2006.01	1968.38
	5020.93	5144.64
	1193.83	2997.91
	3028.28	965.42
	978.74	530.12
	5107.77	1609.26
	1823.66	4932.65
	2850.3	1992.97
	1978.82	1211.4
	991.45	3283.98
	8751.57	5176.39
	2846.41	4712.36
	1150.11	5091.6
	4903.57	3061.53
	4400.48	3570.89
	1350.41	5176.13
	2715.35	2287.72
	3094	2119.12
	3681.88	1987.21
	1170.28	418.35
	330	3947.18
	296.2	612.71
	2538.55	5293.9
	4791.44	822.11
	1549.04	6517.79
	1000	2150.62
	2148.97	484.25
	1932.64	780.55
	1282.09	6544.91
	699.29	2431.98
	1692.89	1162.5
	2051.93	6779.7
	1447.5	3942.88
	869.9	3983.7
	3362.26	3961.53
	1291.46	1109.5
	2466.6	3371.96
	3575.9	6686.2
	1647.43	2580.8
	3409.79	8406.14
	1003	1231
	299.43	4409.5
	1502.57	8102.7
	2386.35	5206.37
	959.21	3530.71
	432.36	3979.79
	415.88	2629.16
	2180.63	3002.24
	1227.6	2885.72
	2974.93	3801.5
	1571.4	3443.05
	1355.9	2682.59
	1023.88	4727.81
	1421.21	2825.8
	2210.4	6312.22
	3549.78	3172.33
	1718.56	3020.57
	1205.67	2873.79
	1892.24	3271.4
	1123.04	3423.57
	1135.2	4568.88
	818	3899.29
	682.06	6792.2
	3519.73	3962.46
	5963.46	6989.86
	3245.55	9860.6
	2451.83	5651.83
	4315.41	2802.07
	1232.5	3675.74
	3500.93	1977.33
	876.33	4939.27
	2641.63	3755.62
	2329.33	5978.6
	2229.44	3329.31
	6153.46	8236.08
	2579.33	4503.79
	213.59	2676.58
	7330.79	3058.27
	2104.38	2192.67
	1760.11	1761.55
	1397.8	1389.58
	612.67	420.36
	4610.97	349.64
	1229.05	6368.7
	1169.88	1825.27
	4216.18	887.92
	6631.36	12040.1
	840.35	1182.71
	1125.16	4681.9
	8881.11	2309.03
	1829.35	697.75
	1514.81	1756.1
	3221.67	483.89
	3836.06	2838.59
	333.36	2609
	883.29	2065.54
	5336.24	4048.53
	750.74	9227.19
	212.5	3276.71
	858	6612.64
	2242	9201.91
	1134.92	4251.7
	1413.27	743.43
	3160.75	1545.52
	550.57	2737.71
	1194.49	3191.64
	3001.63	3219.96
	1611.3	1739.21
	2438.12	1913.97
	2738.15	6447.8
	3185.52	406
	2757.06	9432.44
	621.77	6732.14
	2490.5	602
	562.14
	384.09
	535.13
	1928.28
	588.69
	1606.22
	480.15
	3836.14
	2316.82
	1030.56
	1044.55
	1834.41
	2429.84
	3715.2
	810.85
	1439.66
	1638.24
	202.42
	2543.48
	1959.8
	923.85
	1332.4
	271.11
	2917.76
	735
	1564.73
	682.95
	1169.91
	900.04
	1025.86
	846.15
	1420.82
	683.46
	15333.4
	4069.6
	1716.99
	2750.21
	3559.18
	1751.8
	1013.9
	2617
	2348.85
	1810.46
	1430.38
	1549.43
	2284.33
	1338.67
	1797.26
	2003.57
	2141.23
	3973.64
	2552
	2367.29
	1370.89
	752.83
	948.02
	1331.93
	4649.91
	457.3
	3847.59
	8411.95
	3888.32
	821.29
	5641.28
	6360.71
	1339.95
	3450
	3815.1
	5071.73
	3117.2
	4159.13
	3473.82
	6087.58
	723.88
	4187.9
	750.36
	3197
	3658
	2375.55
	2303.85
	9146.19
	2971.25
	2166
	3391.9
	739.17
	3384.38
	2166.75
	4516.65
	2117.31
	5862.23
	4221.95
	74.8
	1378.27
	2217.24
	563.57
	2144.14
	2158.96
	1229.77
	1241.57
	4229.04
	1699.71
	1375.06
	1758.4
	634
	853.94
	2661.34
	2680.45
	1551.03
	3245.44
	2404.18
	8704.99
	233.05
	152.22
	234.4
	209.33
	1953.57
	1097.56
	1309.9
	3443.91
	896.8
	532.15
	1989.29
	1435.26
	427.84
	3503
	1576.5
	604.83
	1730.1
	1550.51
	2206.67
	6584
	1173.46
	774.53
	3083
	1514.75
	9738.9
	1729.16
	1122.82
	1278
	2050.89
	1680.4
	1800.33
	1487.5
	2860.87
	1392.33
	2656.61
	6575.5
	418.81
	3368.43
	2448.16
	3025.4
	3540.88
	2576.74
	4264.91
	1785.84
	214.4
	582.78
	1226.76
	1816.75
	5981.86
	12343.4
	212.47
	8.53
	631.63
	1154.52
	2961.5
	1682.93
	841.15
	1534.7
	509.34
	1402.67
	316.11
	5099.17
	2683.48
	1805.23
	109.56
	1613.65
	1639.4
	1539.66
	728.82
	596
	2902
	1486.81
	1213.59
	1283.46
	1320.93
	1336.79
	1873.22
	4865.99
	1401.43
	6140.42
	1334.85
	1644.28
	3538.2
	2062.64
	2334.22
	227.67
	1348.25
	773.3
	1515.58
	1158.77
	845.06
	856.1
	2649.72
	2820.63
	3088.83
	1086.63
	2404.43
	2364.67
	1717.86
	1498.79
	2530.51
	1852
	1094.6
	975.67
	449.8
	205.91
	4735.27
	2477.18
	5820.65
	1620.55
	4423.88
	4474.53
	3133.91
	2749.96
	1653.09
	1290.11
	1398.6
	5021.5
	1188.76
	4982.62
	959.59
	840.7
	1336.6
	1220.64
	1043.4
	896.23
	182.11
	250.6
	388.33
	4121.08
	1706.43
	9947.9
	3620.36
	495.89
	2177.23
	629.83
	11385.7
	3422.14
	724.61
	3365
	1123.8
	704.8
	8757.07
	5175.24
	965.56
	1646.83
	3052.44
	3298.91
	575.5
	2530.67
	35.83
	266.2
	2289.6
	1038.95
	2239.9
	4388.68
	6616.48
	2315.45
	1807.57
	3954.43
	3566.78
	3332.5
	1083.05
	2525.94
	596.39
	796
	1154.45
	1231.68
	4056.13
	4274.03
	938.44
	2075.05
	1882.14
	3786.63
	1001
	775.69
	1707.31
	4614.86
	4172.42
	2532.44
	2824.71
	804.4
	1226.43
	3577.65
	12190.4
	1436.8
	759.91
	7182.1
	1167.67
	102.23
	109.43
	1410.28
	348.21
	4027.16
	2340.88
	201.15
	184.27
	1707.27
	2105.19
	5755.77
	902.83
	1942.43
	1193.87
	1405.63
	1731.83
	1989.8
	489.71
	2984.09
	3077.25
	625.1
	7865.67
	802
	1450.94
	1366.95
	6110.32
	941.1
	670.16
	4445
	2813.87
	4299.89
	4293.4
	1306.86
	1272.9
	4271.54
	4622.25
	164.27
	2660.93
	11760.2
	204.5
	745.48
	2283.43
	8086.39
	1388.72
	5227.76
	203
	3027.6
	1134.67
	2650.23
	1579.53
	3949.5
	4387.88
	2489.21
	7901.02
	7401.87
	6268.02
	10562.6
	1511.75
	3042.77
	2992.04
	4451.02
	4175.88
	3619.75
	1317.5
	13467.3
	4357.27
	1452.91
	2153.5
	1257.05
	5197.51
	4199.45
	1875.16
	1170.4
	12415.6
	6639.25
	1973.28
	770.57
	957.29
	4190.95
	2631.72
	2053.17
	263.32
	1580.57
	1107.59
	236.08
	336.75
	483.78
	2396.6
	1322.87
	280.74
	1406.61
	63.14
	914
	2392.65
	1779.92
	4192.2
	4399.34
	4054.77
	1406.44
	1131.83
	2546.56
	1283.53
	1399.29
	5937.85
	2104.19
	4260.47
	1953.68
	3395.7
	3288.68
	973.06
	431.57
	3444.07
	584.53
	684.52
	3879.4
	3442.72
	1146.07
	2758.6
	11341.4
	4269.92
	768.59
	2140.7
	589.05
	2215.69
	1895
	725.56
	960.72
	4004.31
	3541.36
	5002.08
	1464.78
	81.3
	180.8
	1475.31
	1590.25
	3240.15
	293.62
	4614.38
	2885.86
	428.45
	1995.81
	2613.8
	2180.94
	9421.08
	984.46
	1002.13
	6604.28
	750.51
	7121.34
	6283.58
	654.79
	2170.09
	7973.77
	850.5
	4190.24
	1351.16
	530.21
	1887.57
	610.6
	3773.57
	3534.75
	2827.21
	3734.29
	2860.59
	1731.59
	6960.34
	653.13
	673
	2665.33
	3290.08
	1880.69
	2397.99
	4198.43
	1667.26
	4772.59
	4288.4
	2250.5
	2268.54
	2840.35
	2731.44
	1482.9
	2678.05
	1841.22
	9351.09
	6262.79
	1065.45
	4254.25
	5403.75
	2070.73
	9619.5
	80.63
	446.75
	1153.47
	4238.18
	1908.31
	360.8
	1877.88
	407.49
	620.85
	1777.72
	1167.84
	1476.63
	561.55
	1111.88
	679.6
	238.29
	2987
	769.18
	218.29
	1331.81
	385.39
	460.59
	767.83
	1629
	1738.5
	912.29
	777.89
	393.63
	1791.62
	915.6
	2032.48
	2263.67
	3446.2
	1092.53
	278.92
	1584.92
	1577.82
	2035.28
	2467.1
	203.88
	1340.38
	2219.3
	694.73
	3070.17
	3365.83
	4969.8
	179.15
	2425.57
	593.25
	592.78
	2913.6
	2194.76
	396.06
	4678.97
	2901.28
	1879.5
	2753.24
	2104.33
	4652.33
	1187.68
	1379.18
	1955
	122.38
	151.91
	1097.18
	3992.73
	2206.33
	932.84
	859.43
	2041.47
	596.18
	1905.67
	438.9
	3359.44
	2409.05
	2713.16
	2580.28
	1610.72
	372.67
	1220.55
	210
	5096.8
	652.4
	2525.03
	354.8
	3821.87
	1344.77
	2057.06
	6304.7
	1812.93
	1818
	1156.43
	1746.95
	2579.15
	3197.62
	2296.56
	2826.08
	3409.63
	5102.35
	1463.45
	2218.56
	742.22
	1304.29
	1274.17
	781.22
	4129.43
	1429.35
	199.67
	1496.79
	2693
	2752.9
	2173.8
	1779.77
	2214.52
	995.16
	541.52
	2600.36
	2823.53
	602.85
	454.8
	1758.58
	2759.59
	2527.24
	2417.44
	3622.09
	8237.14
	488.14
	101.89
	8403.6
	392.48
	721.41
	1315.5
	906.61
	2234.15
	3781.4
	370.13
	3168.2
	1946.84
	2698.37
	2013.8
	3408.79
	1331
	3627.24
	2586.52
	4696.14
	2551.29
	2067.99
	7246
	1296.76
	593
	3073.89
	2874.62
	1753.6
	2237.38
	3976.64
	1305.58
	2902.65
	925.2
	819.17
	1787.5
	148.29
	1484.61
	1210.77
	375.5
	2119.5
	5654.9
	1963.92
	962.23
	1037.5
	543.1
	2518.51
	3007.18
	2753.98
	169.86
	271.63
	206.75
	1847.4
	422.38
	1031.17
	4772.33
	2688.15
	2075.83
	2225.1
	400.7
	2298.13
	3506.22
	1734.11
	3843.24
	78
	3559.11
	2748.55
	1942.27
	1289.92
	5262.53
	7801.5
	1254.78
	2182.92
	2822.56
	3068.24
	200.18
	145.46
	862.21
	5792.26
	61.54
	851
	1357.17
	633.9
	988.41
	888.52
	1317
	2968.81
	4762.69
	5743.32
	2005.57
	4553
	4456.04
	3625.75
	3727.73
	4066.86
	645.8
	2333.63
	1053.57
	4727.35
	239.91
	1322.8
	461
	614.31
	1425.32
	1506.36
	405.29
	696.66
	8593.47
	937.83
	4482.72
	1843
	1662.73
	913.59
	3034.75
	31.76
	266.71
	1247.88
	75.13
	585.37
	2695.88
	2736.83
	209
	870.09
	228.55
	3427.76
	345.11
	4648.7
	3725.62
	2226.24
	1255
	371.6
	4825.05
	4248.69
	4555.21
	3699.85
	105.05
	4395.1
	929.85
	158.4
	2659.87
	4883.04
	1729.63
	4875.67
	338.34
	10218.9
	503.92
	6813.24
	3933.3
	1084.55
	111.13
	534.44
	2101.17
	3622.81
	228.23
	1756.43
	2981.87
	3384.83
	3604.31
	2627.74
	2391.7
	3452.72
	5200.77
	3170.18
	1907.09
	4303.89
	337.3
	218.15
	3627.56
	2519.37
	1900
	1263
	1704.72
	1512.4
	540.52
	151.1
	1803.3
	101.89
	213.15
	2631.89
	-14.4
	12.63
	1299.06
	1726.5
	1883.67
	110.8
	6415.35
	2117.14
	892.14
	105.58
	2460.5
	4468.65
	3087
	2543.71
	5457.62
	2561.92
	933.5
	626.5
	1084.38
	3261.37
	1852.61
	3150.38
	1580.78
	4639.57
	1632.55
	1815.83
	1692.26
	5625.22
	860.33
	477.83
	3351.43
	4712.14
	2463.82
	121.5
	3210.87
	2398.06
	2119.06
	376.48
	3732
	3336.3
	3123
	3046.38
	1407.43
	4087
	281.78
	157
	3449.86
	4778.96
	1286
	3776
	4243.41
	3025.42
	2908.25
	4029.02
	2088.4
	3853.71
	2584.8
	917.29
	1299.51
	42
	131.69
	68.92
	1170.68
	2371
	2237.29
	455.48
	1948
	58.37
	64.8
	973.16
	1085.85
	3456.29
	1198.26
	5.89
	10749
	104.09
	4616.87
	470.86
	1918.33
	346.43
	224.1
	1138.97
	1817.18
	2166.11
	101.35
	11185.6
	1148.88
	9119.22
	2660.38
	6238.83
	1771.06
	8938.93
	1733.4
	100.18
	2220.25
	2861.02
	843.14
	5351.91
	7391.25
	2966
	1606
	85
	2231.78
	2220.73
	2101.64
	2624.75
	4209.58
	419.76
	2889.88
	5679.38
	1379.02
	805.36
	81.2
	4644.79
	13501
	4260
	3865.1
	1167.74
	198.94
	1421.57
	97.75
	2723.17
	3322.7
	2984.41
	3485.6
	3820.5
	4250.82
	12807
	4377.5
	934.33
	1572.36
	2922.22
	129
	3192
	1696.11
	2361.2
	2247
	1636.46
	264.13
	3534.36
	4116.27
	740.95
	256.65
	1112.33
	793.3
	2522.31
	794.07
	143.69
	29.04
	111.25
	445.22
	969.71
	5619.92
	1029.58
	16.91
	1329.05
	1324.7
	65.17
	9750
	36.07
	1569.81
	1466.56
	2645.69
	274.17
	2911
	691.51
	52.35
	1846.2
	1664.94
	1030.45
	236.5
	996.14
	1146.6
	40.06
	2545.64
	51.56
	2067.87
	977.85
	2608.36
	1074.21
	283
	34.83
	1477.9
	3657.56
	2841.91
	2000.8
	2011.09
	1687.6
	3195.61
	1148.38
	72.89
	463.14
	1410.8
	2514.03
	550
	1358.23
	11689.2
	6815.75
	2192.59
	1579.06
	784
	1918.15
	1117.78
	3916.26
	2457.69
	1306.43
	1664.67
	2701.22
	1634.22
	1674.53
	3496.41
	101.62
	2035.25
	11.31
	1541.91
	990.72
	3213.86
	2401.39
	103.53
	6136.55
	855.26
	3420
	2299.78
	801
	156.34
	100.33
	2847.91
	26.73
	4053
	387.25
	233.36
	2872.72
	3092.56
	605.44
	517.36
	4086.92
	1711.61
	4633.77
	755.22
	2135
	2086.78
	753.31
	2599.66
	924.41
	671.72
	1859.71
	462
	1094.3
	1879.38
	67.24
	903.34
	864
	377.2
	358.4
	1189.18
	475.4
	3420.94
	222.2
	296.96
	335.68
	340.8
	487.67
	162.78
	226.96
	1161.43
	279.67
	948.24
	119.13
	210.64
	2279.59
	7196.88
[truncated: 614 more rows]
