# Supplementary material for: HIV-1 uncoating by release of viral cDNA from capsid-like structures in the nucleus of infected cells
Source: eLife. 2021 Apr 27;10:e64776. doi: 10.7554/eLife.64776 (PMC8169111; doi:10.7554/eLife.64776)
Supplement: Figure 7—figure supplement 1—source data 1. [file elife-64776-fig7-figsupp1-data1.xlsx]

## Sheet: data
	Figure 7 - figure supplement 1 - source data
	Source data of Figure 7 - figure supplement 1b. Given are the number of eGFP.OR3 objects and percent of EdU-positive eGFP.OR3 objects per cell nucleus.
	no. of OR3	% EdU-pos.
	5	100
	4	75
	4	50
	6	66.7
	2	100
	4	75
	7	71.4
	5	100
	5	60
	4	100
	5	100
	3	33.3
	1	0
	5	20
	3	66.7
	6	100
	3	66.7
	2	0
	15	60
	4	75
	1	100
	1	0
	8	87.5
	1	100
	1	0
	2	100
	1	0
	6	83.3
	1	100
	2	100
	2	0
	5	80
	5	100
	1	100
	3	100
	3	0
	2	100
	5	40
	6	100
	4	75
	1	0
	4	75
	7	57.1
	3	66.7
	5	100
	3	100
	3	0
	3	100
	3	66.7
	4	75
	2	0
	1	100
