# Supplementary material for: HIV-1 uncoating by release of viral cDNA from capsid-like structures in the nucleus of infected cells
Source: eLife. 2021 Apr 27;10:e64776. doi: 10.7554/eLife.64776 (PMC8169111; doi:10.7554/eLife.64776)
Supplement: Figure 7—figure supplement 2—source data 1. [file elife-64776-fig7-figsupp2-data1.xlsx]

## Sheet: data
	Figure 7 - figure supplement 2 - source data
	Source data of Figure 7 - figure supplement 2a. Given are the CA IF intensities of nuclear IN.SNAP objects normalized to the nuclear background staining with different treatments in SupT1 cells.			Source data of Figure 7 - figure supplement 2b. Given are the CA IF intensities of nuclear IN.SNAP objects normalized to the nuclear background staining with different treatments in primary CD4+ T cells.
	sample	nucleus		sample	nucleus
	DMSO	0.592688		DMSO	0.999985
	DMSO	1.06814		DMSO	0.906955
	DMSO	0.623601		DMSO	1.01354
	DMSO	0.66764		DMSO	1.07213
	DMSO	0.758606		DMSO	0.931201
	DMSO	1.01301		DMSO	0.964902
	DMSO	1.01171		DMSO	1.04398
	DMSO	0.681506		DMSO	0.868601
	DMSO	1.21275		DMSO	1.0008
	DMSO	1.43371		DMSO	1.14429
	DMSO	0.794125		DMSO	1.04267
	DMSO	0.768502		DMSO	0.985097
	DMSO	1.0505		DMSO	0.875063
	DMSO	0.951458		DMSO	1.11716
	DMSO	0.898601		DMSO	1.05109
	DMSO	1.33182		DMSO	1.20479
	DMSO	1.37738		DMSO	1.06472
	DMSO	1.03744		DMSO	0.969737
	DMSO	1.03127		DMSO	0.976908
	DMSO	1.14172		DMSO	0.964173
	DMSO	1.01778		DMSO	1.01918
	DMSO	0.829259		PF74	0.83283
	DMSO	1.22025		PF74	1.18972
	DMSO	0.744415		PF74	1.20354
	DMSO	1.56159		PF74	1.16234
	DMSO	0.867382		PF74	1.00588
	DMSO	1.23698		PF74	1.42693
	DMSO	1.18875		PF74	1.7046
	DMSO	0.87662		PF74	1.58218
	DMSO	1.51376		PF74	0.895717
	DMSO	0.817689		PF74	1.31643
	DMSO	0.857564		PF74	1.92705
	DMSO	0.855338		PF74	1.25759
	DMSO	0.791753		PF74	1.28783
	DMSO	0.934867		PF74	1.34033
	DMSO	0.830636		PF74	1.32054
	DMSO	0.663904		PF74	1.26222
	DMSO	0.517353		DMSO + MeOH	1.18992
	DMSO	0.474355		DMSO + MeOH	1.10596
	DMSO	0.900277		DMSO + MeOH	1.27173
	DMSO	0.645593		DMSO + MeOH	1.24701
	DMSO	0.795549		DMSO + MeOH	1.03225
	DMSO	0.973541		DMSO + MeOH	1.56499
	DMSO	0.687203		DMSO + MeOH	0.986859
	DMSO	1.20946		DMSO + MeOH	1.05503
	DMSO	0.772535		DMSO + MeOH	1.33425
	DMSO	0.704638		PF74 + MeOH	2.62636
	DMSO	1.12421		PF74 + MeOH	2.91146
	DMSO	1.15166		PF74 + MeOH	1.93264
	DMSO	0.969876		PF74 + MeOH	1.91906
	DMSO	1.34027		PF74 + MeOH	1.45172
	DMSO	1.84638		PF74 + MeOH	2.08898
	DMSO	0.985533		PF74 + MeOH	1.807
	DMSO	0.767674		PF74 + MeOH	2.47642
	PF74	1.1507		PF74 + MeOH	1.42473
	PF74	1.07514		PF74 + MeOH	1.89706
	PF74	1.11717		PF74 + MeOH	3.19629
	PF74	1.06003		PF74 + MeOH	2.03819
	PF74	1.20007		PF74 + MeOH	2.35556
	PF74	1.039		PF74 + MeOH	1.22098
	PF74	0.809755		PF74 + MeOH	2.18289
	PF74	1.16892		PF74 + MeOH	1.28688
	PF74	0.767378		PF74 + MeOH	1.11825
	PF74	0.912125		PF74 + MeOH	2.02
	PF74	1.17933		PF74 + MeOH	1.36274
	PF74	1.03438		PF74 + MeOH	1.96485
	PF74	0.928716		PF74 + MeOH	2.19021
	PF74	1.20394		PF74 + MeOH	1.80249
	PF74	1.04865		PF74 + MeOH	2.0969
	PF74	0.529077		PF74 + MeOH	1.32643
	PF74	1.06759		PF74 + MeOH	1.91515
	PF74	0.518038		PF74 + MeOH	1.87086
	PF74	0.478816		PF74 + MeOH	1.86898
	PF74	0.635795		PF74 + MeOH	3.06313
	PF74	0.764719		PF74 + MeOH	1.36207
	PF74	1.44665		PF74 + MeOH	3.13958
	PF74	0.581523		PF74 + MeOH	1.85282
	PF74	1.24092		PF74 + MeOH	2.25416
	PF74	1.29282		DMSO monoclonal	1.25405
	PF74	1.38186		DMSO monoclonal	0.951251
	PF74	0.717147		DMSO monoclonal	0.78736
	PF74	0.754151		DMSO monoclonal	0.958621
	PF74	1.4609		DMSO monoclonal	1.36013
	PF74	1.10467		DMSO monoclonal	1.22945
	PF74	1.19825		DMSO monoclonal	1.28902
	PF74	1.21793		DMSO monoclonal	0.927339
	DMSO + MeOH	0.891104		DMSO monoclonal	1.32281
	DMSO + MeOH	1.3954		DMSO monoclonal	0.953276
	DMSO + MeOH	1.50817		DMSO monoclonal	1.27413
	DMSO + MeOH	1.39353		DMSO monoclonal	1.00234
	DMSO + MeOH	1.09276		DMSO monoclonal	1.36184
	DMSO + MeOH	0.768745		DMSO monoclonal	1.05683
	DMSO + MeOH	0.999651		DMSO monoclonal	0.977803
	DMSO + MeOH	1.07088		PF74 monoclonal	1.96459
	DMSO + MeOH	1.12869		PF74 monoclonal	2.10307
	DMSO + MeOH	1.10968		PF74 monoclonal	1.19905
	DMSO + MeOH	0.995668		PF74 monoclonal	0.98668
	DMSO + MeOH	0.914341		PF74 monoclonal	1.54996
	DMSO + MeOH	1.01398		PF74 monoclonal	1.00061
	DMSO + MeOH	0.927485		PF74 monoclonal	1.37917
	DMSO + MeOH	0.927838		PF74 monoclonal	1.12951
	DMSO + MeOH	1.24704		PF74 monoclonal	1.15274
	DMSO + MeOH	0.987432		PF74 monoclonal	1.27811
	DMSO + MeOH	0.879079		PF74 monoclonal	1.28464
	DMSO + MeOH	1.50329		DMSO + MeOH monoclonal	1.28553
	DMSO + MeOH	1.4379		DMSO + MeOH monoclonal	1.33023
	DMSO + MeOH	1.1524		DMSO + MeOH monoclonal	1.04561
	DMSO + MeOH	0.877893		DMSO + MeOH monoclonal	1.35118
	DMSO + MeOH	1.11194		DMSO + MeOH monoclonal	1.27342
	DMSO + MeOH	2.25417		DMSO + MeOH monoclonal	1.22981
	DMSO + MeOH	1.38685		DMSO + MeOH monoclonal	0.986092
	DMSO + MeOH	1.45569		DMSO + MeOH monoclonal	1.04713
	DMSO + MeOH	1.22129		DMSO + MeOH monoclonal	1.04246
	DMSO + MeOH	1.14423		DMSO + MeOH monoclonal	1.54726
	DMSO + MeOH	1.24723		DMSO + MeOH monoclonal	1.28749
	DMSO + MeOH	1.3829		DMSO + MeOH monoclonal	1.58354
	DMSO + MeOH	0.785599		DMSO + MeOH monoclonal	1.25334
	DMSO + MeOH	1.49042		DMSO + MeOH monoclonal	1.08332
	DMSO + MeOH	1.13381		DMSO + MeOH monoclonal	1.29105
	DMSO + MeOH	1.22186		DMSO + MeOH monoclonal	1.84998
	DMSO + MeOH	1.65352		DMSO + MeOH monoclonal	1.04519
	DMSO + MeOH	0.734402		DMSO + MeOH monoclonal	1.39028
	DMSO + MeOH	0.857615		DMSO + MeOH monoclonal	1.28605
	DMSO + MeOH	0.969801		DMSO + MeOH monoclonal	1.16902
	DMSO + MeOH	1.0512		DMSO + MeOH monoclonal	1.13669
	DMSO + MeOH	0.880504		DMSO + MeOH monoclonal	1.53774
	DMSO + MeOH	0.802761		PF74 + MeOH monoclonal	2.80953
	DMSO + MeOH	1.05751		PF74 + MeOH monoclonal	1.40384
	DMSO + MeOH	0.969275		PF74 + MeOH monoclonal	1.40583
	DMSO + MeOH	0.940071		PF74 + MeOH monoclonal	1.2384
	DMSO + MeOH	1.00176		PF74 + MeOH monoclonal	1.46352
	DMSO + MeOH	0.927711		PF74 + MeOH monoclonal	2.59524
	DMSO + MeOH	1.11149		PF74 + MeOH monoclonal	2.36226
	DMSO + MeOH	1.26689		PF74 + MeOH monoclonal	1.87639
	PF74 + MeOH	3.63494		PF74 + MeOH monoclonal	2.51995
	PF74 + MeOH	2.97318		PF74 + MeOH monoclonal	1.66658
	PF74 + MeOH	2.627		PF74 + MeOH monoclonal	2.90572
	PF74 + MeOH	1.56858		PF74 + MeOH monoclonal	3.03883
	PF74 + MeOH	1.97305		PF74 + MeOH monoclonal	2.62892
	PF74 + MeOH	1.4327		PF74 + MeOH monoclonal	2.11818
	PF74 + MeOH	1.47354		PF74 + MeOH monoclonal	3.2358
	PF74 + MeOH	1.36075		PF74 + MeOH monoclonal	2.66766
	PF74 + MeOH	0.890241		PF74 + MeOH monoclonal	2.2964
	PF74 + MeOH	1.22318		PF74 + MeOH monoclonal	1.88242
	PF74 + MeOH	1.79207		PF74 + MeOH monoclonal	2.43534
	PF74 + MeOH	1.34337		PF74 + MeOH monoclonal	1.07431
	PF74 + MeOH	1.70923		PF74 + MeOH monoclonal	2.51339
	PF74 + MeOH	1.24572		PF74 + MeOH monoclonal	1.94265
	PF74 + MeOH	1.85841		PF74 + MeOH monoclonal	2.29874
	PF74 + MeOH	1.40468		PF74 + MeOH monoclonal	1.75628
	PF74 + MeOH	2.61405		PF74 + MeOH monoclonal	1.9613
	PF74 + MeOH	2.06647		PF74 + MeOH monoclonal	1.42035
	PF74 + MeOH	2.94752		PF74 + MeOH monoclonal	2.57624
	PF74 + MeOH	1.9129		PF74 + MeOH monoclonal	3.22638
	PF74 + MeOH	2.06846		PF74 + MeOH monoclonal	1.862
	PF74 + MeOH	3.0218		PF74 + MeOH monoclonal	1.36948
	PF74 + MeOH	2.25258		PF74 + MeOH monoclonal	2.92337
	PF74 + MeOH	2.14463		PF74 + MeOH monoclonal	2.55705
	PF74 + MeOH	2.96125		PF74 + MeOH monoclonal	2.10345
	PF74 + MeOH	1.81916		PF74 + MeOH monoclonal	1.61957
	PF74 + MeOH	3.25493		PF74 + MeOH monoclonal	1.63583
	PF74 + MeOH	3.2926		PF74 + MeOH monoclonal	1.85353
	PF74 + MeOH	2.25629		PF74 + MeOH monoclonal	1.71127
	PF74 + MeOH	2.82117		PF74 + MeOH monoclonal	4.10473
	PF74 + MeOH	2.81067		PF74 + MeOH monoclonal	4.13493
	PF74 + MeOH	2.57482		PF74 + MeOH monoclonal	3.21738
	PF74 + MeOH	1.34728		PF74 + MeOH monoclonal	2.36391
	PF74 + MeOH	2.3188		PF74 + MeOH monoclonal	3.42179
	PF74 + MeOH	2.77931		PF74 + MeOH monoclonal	2.37054
	PF74 + MeOH	3.90465		PF74 + MeOH monoclonal	1.89904
	DMSO monoclonal	0.940497		PF74 + MeOH monoclonal	2.33404
	DMSO monoclonal	0.67059		PF74 + MeOH monoclonal	2.27775
	DMSO monoclonal	1.28216		PF74 + MeOH monoclonal	2.88861
	DMSO monoclonal	1.2225
	DMSO monoclonal	0.792342
	DMSO monoclonal	1.01031
	DMSO monoclonal	0.941538
	DMSO monoclonal	0.790874
	DMSO monoclonal	1.74039
	DMSO monoclonal	1.04706
	DMSO monoclonal	0.635996
	DMSO monoclonal	1.05852
	DMSO monoclonal	1.23253
	DMSO monoclonal	0.984386
	DMSO monoclonal	1.14813
	DMSO monoclonal	0.921911
	DMSO monoclonal	0.851766
	DMSO monoclonal	0.915558
	DMSO monoclonal	1.22866
	DMSO monoclonal	1.16796
	DMSO monoclonal	1.10102
	DMSO monoclonal	0.949065
	DMSO monoclonal	0.957273
	DMSO monoclonal	0.871834
	DMSO monoclonal	0.975993
	DMSO monoclonal	0.945452
	DMSO monoclonal	1.07254
	DMSO monoclonal	1.18088
	DMSO monoclonal	1.0959
	DMSO monoclonal	1.22718
	DMSO monoclonal	1.26361
	DMSO monoclonal	1.1551
	PF74 monoclonal	0.97504
	PF74 monoclonal	1.00231
	PF74 monoclonal	1.16094
	PF74 monoclonal	1.22016
	PF74 monoclonal	1.14575
	PF74 monoclonal	1.10602
	PF74 monoclonal	1.12261
	PF74 monoclonal	1.02184
	PF74 monoclonal	1.25477
	PF74 monoclonal	1.00802
	PF74 monoclonal	1.02577
	PF74 monoclonal	1.07105
	PF74 monoclonal	1.40079
	PF74 monoclonal	1.13695
	PF74 monoclonal	1.06668
	PF74 monoclonal	0.866241
	PF74 monoclonal	1.15033
	PF74 monoclonal	1.18164
	PF74 monoclonal	1.09771
	PF74 monoclonal	1.26754
	PF74 monoclonal	0.78504
	PF74 monoclonal	1.17634
	PF74 monoclonal	0.753832
	PF74 monoclonal	0.70939
	PF74 monoclonal	1.14973
	PF74 monoclonal	0.901782
	PF74 monoclonal	0.988411
	PF74 monoclonal	0.730752
	PF74 monoclonal	0.953197
	PF74 monoclonal	1.02199
	PF74 monoclonal	0.917801
	PF74 monoclonal	0.944899
	PF74 monoclonal	0.891701
	PF74 monoclonal	0.842069
	PF74 monoclonal	0.753664
	PF74 monoclonal	1.03767
	PF74 monoclonal	1.52639
	PF74 monoclonal	1.13463
	PF74 monoclonal	1.82126
	PF74 monoclonal	1.09106
	PF74 monoclonal	1.16448
	PF74 monoclonal	1.40659
	DMSO + MeOH monoclonal	1.18596
	DMSO + MeOH monoclonal	0.974957
	DMSO + MeOH monoclonal	1.27356
	DMSO + MeOH monoclonal	1.48854
	DMSO + MeOH monoclonal	1.29065
	DMSO + MeOH monoclonal	0.858188
	DMSO + MeOH monoclonal	1.18279
	DMSO + MeOH monoclonal	0.984099
	DMSO + MeOH monoclonal	0.998663
	DMSO + MeOH monoclonal	0.977907
	DMSO + MeOH monoclonal	1.15032
	DMSO + MeOH monoclonal	1.36552
	DMSO + MeOH monoclonal	1.15032
	DMSO + MeOH monoclonal	1.06269
	DMSO + MeOH monoclonal	0.960166
	DMSO + MeOH monoclonal	0.8049
	DMSO + MeOH monoclonal	1.2626
	DMSO + MeOH monoclonal	1.22238
	DMSO + MeOH monoclonal	1.45775
	DMSO + MeOH monoclonal	1.36219
	DMSO + MeOH monoclonal	2.36911
	DMSO + MeOH monoclonal	2.25582
	DMSO + MeOH monoclonal	1.53585
	DMSO + MeOH monoclonal	1.3516
	DMSO + MeOH monoclonal	1.20565
	DMSO + MeOH monoclonal	1.01633
	DMSO + MeOH monoclonal	1.12297
	DMSO + MeOH monoclonal	0.930452
	DMSO + MeOH monoclonal	3.84853
	DMSO + MeOH monoclonal	1.39171
	DMSO + MeOH monoclonal	1.56572
	DMSO + MeOH monoclonal	1.79033
	DMSO + MeOH monoclonal	2.03636
	DMSO + MeOH monoclonal	1.69702
	DMSO + MeOH monoclonal	1.75756
	DMSO + MeOH monoclonal	2.54638
	DMSO + MeOH monoclonal	1.65373
	DMSO + MeOH monoclonal	1.93609
	DMSO + MeOH monoclonal	2.48135
	DMSO + MeOH monoclonal	1.40894
	DMSO + MeOH monoclonal	2.35866
	DMSO + MeOH monoclonal	2.16476
	DMSO + MeOH monoclonal	1.2932
	DMSO + MeOH monoclonal	1.56374
	DMSO + MeOH monoclonal	1.58407
	DMSO + MeOH monoclonal	1.51119
	DMSO + MeOH monoclonal	1.07952
	DMSO + MeOH monoclonal	1.26914
	DMSO + MeOH monoclonal	0.903737
	DMSO + MeOH monoclonal	0.838642
	DMSO + MeOH monoclonal	1.14641
	PF74 + MeOH monoclonal	1.62171
	PF74 + MeOH monoclonal	1.1835
	PF74 + MeOH monoclonal	2.51608
	PF74 + MeOH monoclonal	1.36968
	PF74 + MeOH monoclonal	2.17124
	PF74 + MeOH monoclonal	2.14504
	PF74 + MeOH monoclonal	1.38763
	PF74 + MeOH monoclonal	2.41398
	PF74 + MeOH monoclonal	2.24358
	PF74 + MeOH monoclonal	1.48623
	PF74 + MeOH monoclonal	2.4778
	PF74 + MeOH monoclonal	5.49356
	PF74 + MeOH monoclonal	1.24565
	PF74 + MeOH monoclonal	3.17404
	PF74 + MeOH monoclonal	1.89215
	PF74 + MeOH monoclonal	1.52456
	PF74 + MeOH monoclonal	1.18751
	PF74 + MeOH monoclonal	2.09935
	PF74 + MeOH monoclonal	1.69738
	PF74 + MeOH monoclonal	1.49069
	PF74 + MeOH monoclonal	1.23039
	PF74 + MeOH monoclonal	1.39432
	PF74 + MeOH monoclonal	2.25474
	PF74 + MeOH monoclonal	1.99328
	PF74 + MeOH monoclonal	1.46194
	PF74 + MeOH monoclonal	1.441
	PF74 + MeOH monoclonal	1.485
	PF74 + MeOH monoclonal	1.02795
	PF74 + MeOH monoclonal	1.68014
	PF74 + MeOH monoclonal	2.27592
	PF74 + MeOH monoclonal	2.06741
	PF74 + MeOH monoclonal	1.19619
	PF74 + MeOH monoclonal	2.58875
	PF74 + MeOH monoclonal	1.2158
	PF74 + MeOH monoclonal	1.40514
	PF74 + MeOH monoclonal	1.5474
	PF74 + MeOH monoclonal	2.40087
	PF74 + MeOH monoclonal	2.32383
	PF74 + MeOH monoclonal	3.50532
	PF74 + MeOH monoclonal	1.19182
	PF74 + MeOH monoclonal	1.28919
	PF74 + MeOH monoclonal	3.30095
	PF74 + MeOH monoclonal	1.79212
	PF74 + MeOH monoclonal	1.08452
	PF74 + MeOH monoclonal	2.59208
	PF74 + MeOH monoclonal	2.29054
	PF74 + MeOH monoclonal	1.87151
	PF74 + MeOH monoclonal	1.68675
	PF74 + MeOH monoclonal	1.14355
	PF74 + MeOH monoclonal	2.11204
	PF74 + MeOH monoclonal	3.95682
	PF74 + MeOH monoclonal	1.94719
	PF74 + MeOH monoclonal	2.07116
	PF74 + MeOH monoclonal	2.86391
	PF74 + MeOH monoclonal	2.0715
	PF74 + MeOH monoclonal	2.95097
	PF74 + MeOH monoclonal	2.612
