# Supplementary material for: HIV-1 uncoating by release of viral cDNA from capsid-like structures in the nucleus of infected cells
Source: eLife. 2021 Apr 27;10:e64776. doi: 10.7554/eLife.64776 (PMC8169111; doi:10.7554/eLife.64776)
Supplement: Figure 7—source data 1. [file elife-64776-fig7-data1.xlsx]

## Sheet: data
	Figure 7 - source data
	Source data of Figure 7c. Given are the normalized (to the nuclear expression) CPSF6 intensities of IN.SNAP.SiR objects.					Source data of Figure 7e. Given are the normalized (to the mean intensity of glass-bound particles of the DMSO sample) CA intensities of IN.SNAP.SiR objects at different locations at 7 hours p.i..										Source data of Figure 7f. Given are the normalized (to the mean intensity of glass-bound particles of the DMSO sample) CA intensities of IN.SNAP.SiR objects at different locations at 24 hours p.i..
						DMSO					PF74					DMSO					PF74
	DMSO 7 hpi	PF74 7 hpi	DMSO 24 hpi	PF74 24 hpi		glass	cell-assoc.	NE	nucleus		glass	cell-assoc.	NE	nucleus		glass	cell-assoc.	NE	nucleus		glass	cell-assoc.	NE	nucleus
	1.90227	1.01448	4.12845	1.01008		0.71079	0.813493	0.460927	0.336264		1.9929	0.921528	0.960586	0.644033		1.01259	1.88005	1.33229	0.158428		2.68577	0.0933007	1.29041	1.44894
	2.65638	0.994508	2.88576	0.872282		1.1384	0.261135	0.410647	0.126394		0.868348	2.22864	2.92036	0.164932		1.78729	0.840011	0.296619	0.631522		1.60189	0.815599	-0.0816211	3.40435
	1.88174	1.13311	2.98122	1.03354		0.653218	0.64522	0.715014	0.318557		1.06942	0.234429	1.19296	0.666409		0.616808	0.78865	0.299856	0.177278		3.18479	1.98999	0.243087	0.333308
	1.40783	0.76282	17.1347	0.922196		0.693649	0.464476	0.548723	0.195744		1.20014	0.132719	2.33459	1.20742		0.533134	0.832781	-0.0102848	0.326341		1.6493	0.4994	0.0321653	1.0074
	2.21414	1.09963	4.98189	1.09845		1.73561	0.273501	0.247623	0.0842928		1.9052	0.0770291	0.550293	1.00475		1.27255	1.46973	1.32198	0.0825475		0.182064	0.2002	0.215114	0.486052
	4.49808	0.991551	4.10503	0.929142		0.692825	-0.0500644	0.385719	0.0931269		0.876773	0.734313	1.13918	0.924213		0.102114	0.169454	0.118897	0.545342		0.983365	7.4488	1.99128	0.5719
	3.20961	0.895241	3.49387	1.29786		1.62049	0.509034	0.0436755	0.0949661		1.00571	1.41087	2.34975	3.36828		2.01622	0.169437	0.0671133	-0.0763493		1.55374	0.589942	0.186325	-0.245213
	4.19657	1.16927	2.15359	0.729693		1.5439	1.4151	0.783739	0.249186		2.17909	0.320686	-0.232504	2.2791		1.16499	0.616224	0.148234	0.170374		0.393283	-0.435992	1.06463	0.494516
	1.55068	1.0614	4.64701	1.09984		0.986618	1.85046	0.578986	0.460088		1.81224	0.816821	0.544628	1.16943		1.08814	1.47801	-0.0260056	0.0684522		1.4555	-0.404071	-0.396545	0.783235
	6.73739	0.987202	4.5613	1.10851		0.961019	0.0955039	0.752982	0.128273		1.0872	0.242277	0.0621934	1.10289		0.919429	1.33151	0.654332	0.141058		1.64002	-0.105742	-0.56825	1.10228
	4.66193	0.664193	4.71173	0.952453		1.02057	0.634349	0.348583	0.0428079		1.37201	1.09166	0.35205	0.567456		1.08845	1.63169	-0.718998	0.0327666		0.248621	-0.725979	0.777278	0.995153
	3.33238	1.06611	2.23648	0.963877		0.404875	0.16699	0.901626	0.636622		1.40898	1.07254	0.19967	1.78566		1.01189	1.07192	-0.148567	-0.00604083		0.759589	-0.207902	0.362708	0.782399
	3.0671	0.89227	3.25221	0.938315		0.825737	0.295916	3.37734	0.118987		0.92569	0.541968	0.860163	0.44992		1.24217	1.18059	0.156722	0.487591		2.34556	-0.330183	0.443809	1.15927
	1.54995	0.91558	2.78356	1.01268		1.01376	0.541158	1.63624	0.499727		0.61168	-0.0900472	0.992276	2.17729		0.812851	1.04471	-0.425431	0.00532767		0.156299	2.23343	0.163323	0.838326
	5.27491	0.789287	2.18521	0.857771		0.385303	-0.00414096	0.601562	0.0395848		1.60325	-0.21884	0.253624	1.30813		1.13189	0.382201	-0.264272	0.200987		1.44347	0.713587	0.53082	0.145294
	2.32087	0.946518	2.40137	1.27808		0.793212	0.36267	0.636855	0.0403197		0.731348	1.11564	0.32378	3.19303		1.05427	0.369011	0.169699	-0.0994639		0.350763	0.437963	0.709164	-0.550145
	1.77283	0.992737	2.3563	1.33694		1.23779	0.689881	0.133267	0.0956115		0.946209	0.972671	0.305395	2.35474		1.56068	1.37093	0.728919	0.0927763		0.567282	0.706794	0.447871	0.236697
	3.21016	1.0611	2.13306	1.18974		1.85638	0.55224	0.66966	0.195052		0.56984	0.659883	1.10178	6.80941		1.35432	1.12976	-0.102327	0.017287		2.06613	0.292704	4.51676	0.355636
	2.27158	1.10529	2.5317	1.18974		1.21687	0.81396	0.690989	0.139832		1.69883	0.368822	0.986234	1.70972		1.13248	1.66786	0.927438	0.2253		0.657171	1.7209	1.17818	2.23334
	3.50113	0.991813	1.33589	1.27609		1.22757	1.06676	0.283959	-0.00356015		0.959015	0.385712	-0.00523805	1.38401		0.0967756	0.4822	0.496159	0.253498		2.43473	0.72943	0.186004	1.41004
	1.51964	0.964963	1.70365	1.06533		1.43968	0.65025	0.596808	-0.0846442		2.07506	0.402728	0.559292	0.874855		0.119429	0.629137	-0.129986	0.125913		1.20534	-0.578699	1.26825	1.61791
	1.75051	0.968129	3.16381	1.11742		4.05485	1.52921	0.439602			0.793452	0.906359	-0.0201312	0.251308		0.843566	0.902946	0.388749	0.461064		0.232002	0.0258623	0.352004	1.92419
	1.4611	0.871586	2.03999	0.980005		0.538602	1.47261	1.23197			1.19931	0.54944	0.727053	2.58847		2.01017	3.2209	0.352371	-0.0753076		0.289939	1.00303	0.864489	1.95261
	1.63569	0.928391	3.23249	1.06106		0.769345	1.21189	1.71066			1.1925	1.04705	-0.0759607	2.37873		1.56761	0.316986	0.62302	0.159991		1.4057	0.332162	-0.402002	0.809583
			3.43335	0.97573		1.08384	0.7318	0.247587			1.73365	-0.048383	0.601824	1.01901		2.41096	0.872973	0.763913	0.228989		1.24637	0.0658793	1.86502	3.82485
			1.54068			0.855613	1.15136	0.730248			1.0302	0.0485945	0.00446722	1.62897		0.942268	0.531733	-0.12068	0.310274		1.16187	0.864688	0.25799	1.47024
			2.59788			1.25787	0.134537	1.33374			0.735453	0.431499	1.02493	1.99374		1.6795	0.204542	0.255735	0.074972		0.790936	0.389924	-0.95041	0.695601
			2.64269			1.18739	0.363147	1.12734			1.87794	0.223895	0.143424	0.990799		0.628728	0.401991	0.629777	-0.0893294		0.187968	0.305188		1.14732
			2.4708			1.38841	0.54593	0.495693			0.19427	0.687809	-0.303416	0.539417		1.68201	3.03643	-0.41021	0.124658		1.20009	-0.0309732		1.37685
			2.42154			1.07908	0.560977	0.740871			0.865777	-0.360777	0.589297	1.58267		0.659387	0.835253	3.13168	-0.0771918		0.580094	0.148221		1.16876
			2.56892			1.64678	0.341423	0.753129			0.681743	0.072967	1.38641			0.154006	0.240427	1.39109	-0.0784608		0.239536	1.49935		1.29234
			2.26539			0.916509	0.765634	0.600781			1.49144	1.73763	0.333636			1.50217	0.0681271	4.02602	0.0458271		0.289981	-0.0360317		0.0881059
			3.00213			1.17417	1.64561	0.195289			0.316147	0.112233	0.246508			0.485916	0.978964	0.552236	0.214177		2.69101	1.30008		1.20665
			1.82875			1.64169	0.0854867	0.211989			2.00266	-0.0657428	0.219511			1.64049	1.16081	0.439834	0.107295		2.11914	0.440383		0.305646
			3.09545			1.84415	1.29914	0.420055			1.22666	0.728559	1.24312			2.80896	0.556053	0.634846	0.0482812		1.09215	0.130252		0.702379
			3.39581			0.969732	0.212742	0.523436			0.954035	-0.458593	0.418854			0.330431	0.190279	0.402876	0.201602		0.845233	-0.198484		1.54181
						0.840939	1.31661				0.114359	0.298612	0.0429298			0.582583	0.810425	-0.132045	-0.097265		3.80698	-0.202361		2.05486
						1.63628	1.02614				2.0049	0.503179	0.185727			0.761186	-0.054703	0.255641	0.0949822		0.116289	0.843905		1.90529
						1.00175	1.05221				1.57385	0.856993	0.916171			0.696695	0.641055	0.677356	0.15158		0.760742	-0.151395		1.32736
						1.33707	1.11287				0.445568	0.710511	2.42624			0.696786	0.648592		0.244244		1.25099	0.427105		0.60861
						0.612246	0.740007				1.4902	0.653864	0.641907			1.76299	1.30076		0.135366		2.50029	0.106893		0.391091
						0.963371	1.03309				2.31398	0.112197	0.886346			0.0788489	0.459288		-0.153643		0.381289	0.94956		1.01756
						1.08562	1.25728				1.04111	-0.453929	-0.104137			0.0892315	0.112171		0.0129381		1.47283	0.956849
						0.78024	1.27309				1.01501	1.8009	0.971635			0.218595	-0.383323				0.692066	0.586201
						1.28008	0.851788				0.889411	0.488512	0.232281			1.75956	-0.0881863				1.53109	0.795085
						1.08616	0.527631				1.37495	0.899493	0.458715			3.29546	3.16428				0.951221	-0.243972
						0.53844	0.888432				1.46749	3.36489	0.0539365			0.0424186	-0.234474				0.990224	-0.217533
						0.66135	1.10036				0.538942	0.403323	-0.151412			0.081663	-0.791471				1.03351	-0.508031
						1.73991	0.0983936				1.08026	1.14337	-0.199673			0.802462	-0.370864				0.62877	-0.47231
						0.795739	0.602369				0.165352	0.738279	0.841383			0.455261	0.345355				2.55949	0.390518
						1.7288	1.19385				0.844671	0.724773	0.812092			0.138002	0.150402				1.1892	-0.0350634
						0.51045	0.84935				1.11159	0.471059	1.1935			0.785444	1.53151				1.51234	3.74069
						0.64385	1.81571				1.38106	2.71249	0.24949			2.14007	0.888938				1.40742	1.35758
						2.25576	0.338874				0.713705	0.716957				1.76991	1.02293				0.74828	2.22709
						0.794778	0.649565				1.56275	3.80843				0.72643	0.228933				2.57346	1.48653
						1.34383	1.1453				0.437548	0.0829269				0.463217	1.23382				0.984515	1.1953
						0.705144	0.644359				0.864322	0.404961				0.43524	2.10061				0.412423	0.710629
						1.03949	0.264029				1.00687	2.08057				0.810471	3.25935				0.958499	0.515662
						2.38012	0.994617				0.682528	0.376258				0.644792	1.14588				0.476016	0.939831
						1.62765	0.562375				1.09059	1.3499				0.602261	0.57476				1.05655	1.22323
						1.88713	0.847439				0.659403	0.608966				0.334934	1.0961				0.475844	1.4952
						1.46777	1.50933				1.05594	1.17993				1.36727	0.707336				0.713293	0.661159
						0.800124	0.559217				0.834582	0.136957				0.465287	-0.403302				1.01318	1.25619
						0.879125	0.950554				0.615021	-0.454348				0.574382	0.553963				0.441592	-0.003786
						0.70054	0.308005				0.235192	1.09287				1.56699	1.37436				4.81074	0.239385
						0.520102	0.764727				0.205779	0.426132				0.914937	1.11371				0.82301	1.20664
						2.02395	0.386046				0.799956	2.58229				1.68811	0.436729				1.05055	2.06961
						0.624615	0.72103				1.46589	-0.1519				0.066145	-0.0541332				0.95171	0.372266
						2.05783	0.773747				0.964791	-0.0953247				0.743148	1.06809				0.171297	0.799885
						0.789332	0.767419				0.21652	0.486856				0.565412	0.22844				0.732331	1.06007
						0.811256	0.375921				0.699959	-0.154843				0.159432	1.7723				0.217246	0.860832
						1.2338	0.499719				0.535966	-0.203223				1.21093	1.92899				1.15975	0.78443
						2.35148	0.584303				0.204517	0.333163				0.485671	0.005055				1.26909	2.49582
						1.91905	0.68612				0.784378	0.716548				1.49266	0.846838				0.285747	0.898412
						1.83399	0.691731				0.231482	0.00581528				0.718463	0.408773				1.37292	0.917744
						1.46726	2.29722				1.27873	1.17492				0.718565	0.341356				0.176163	0.391941
						0.604491	1.55985				1.07528	1.43287				3.16075	0.457722				1.42552	1.11904
						1.55007	0.224523				2.23855	0.44598				0.622422	0.246122				1.15354	0.515106
						1.82095	1.05328				0.929297	0.761117				1.31044	-0.251796				0.887082	1.68647
						2.83723	0.489498				0.676523	1.27132				2.6193	0.748444				0.734558	1.84712
						1.82954	1.10326				1.19262	0.669001				2.44337	0.193016				0.12038	1.31367
						0.730939	0.373343				0.689824	0.895237				1.48097	1.18772				1.56827	1.71137
						1.13072	-0.117618				0.456811	0.616186				0.938282	1.37083				1.7342	1.76433
						0.67786	0.723453				0.616846	0.948571				1.12882	0.840598				1.12647	1.62561
						2.12009	0.588748				0.288577	0.704936				1.20211	0.628592				0.184836	1.22547
						0.600067	0.661522				1.09631	0.133257				0.454111	0.425819				2.08925	1.0495
						0.865247	0.472235				1.26018	0.553771				0.0933567	1.16809				1.2224	0.544409
						0.946883	0.182966				1.44012	0.264814				0.52516	-0.265713				1.76683	1.87173
						0.856448	0.0305177				0.556338	1.83026				3.35734	0.148325				1.24697	0.931717
						0.389921	1.47867				0.616871	-0.193951				0.249649					1.31039	1.07603
						0.481187	0.509127				0.729161	0.591882				0.896888					2.88211	1.69863
						0.585034	-0.00930373				0.554595	-0.326247				0.310494					0.624075	0.908078
						1.50261	0.472264				2.2887	-0.0103936				1.24475					0.955943	0.398866
						1.17223	2.73654				1.03046	0.603455				0.603625					0.628215	1.26534
						0.938174	0.611665				0.900916	0.22188				0.974531					0.873225	1.03379
						0.791451	0.3725				0.097612	0.182106				0.253379					0.805486	0.918964
						1.67343	0.26595				0.205392	0.280532				0.40735					1.37655	0.375472
						1.20193	1.35478				1.39061	1.80883				1.40375					0.18291	0.667015
						2.21458	0.459289				1.25762	0.334794				0.592665					0.153716	0.776383
						0.200369	0.628749				0.355044	0.742627				0.900569					0.338283	1.90771
						0.405721	0.377244				0.46272	0.412856				1.81848					0.690734	3.30685
						0.912515	0.0941379				0.638361	0.521012				1.61921					0.356031	0.290739
						0.711852	0.0906961				0.992724	0.160429				0.843339					0.717568	3.2584
						1.25699	0.252889				1.20227	1.17609				0.570963					1.20192	0.386917
						1.25155	0.754125				0.64702	0.183339				1.36107					0.926064	2.34832
						0.622066	1.7816				0.905975	-0.0202997				0.673573					0.673049	-0.394779
						0.312193	1.17966				0.816885	0.00484726				1.03288						1.41643
						1.09632	0.874188				1.22864	0.140635				0.126361						0.177365
						1.26977	0.502161				4.3094	0.870944				0.133349						0.308327
						0.973281	0.173175				0.662228	0.566186				0.917342
						0.653254	0.307202				0.18231	0.214244				1.16115
						1.24239	1.31777				0.749127	-0.260877				1.19165
						0.781879	1.02536				0.546145	0.986475
						0.722202	0.612866				1.07473	0.0303563
						1.22703	0.630818				0.201821	0.737898
						1.63261	0.800827				0.684288	0.345349
						0.510203	0.496098				0.30784	0.0856301
						0.95325	-0.153667				1.48586	0.262509
						0.368159	-0.00662554				0.442897	-0.192689
						0.929132	0.0937185				0.0765595	0.12154
						0.308636	0.63787				0.307797	0.80377
						1.01968	0.0122293				0.432837	0.378789
						0.882502	0.812579				0.386716	1.69101
						0.237035	0.79983				0.679237	0.00181414
						2.48802	1.45078				0.606452	0.286207
						0.776512	0.121644				1.27889	0.412716
						1.66085	1.26362				0.437429	0.239344
						0.447192	0.840042				0.2686	-0.111978
						0.631678	0.993986				0.872758	0.757054
						1.0967	0.65979				1.22378	1.55412
						0.606266	1.41321				0.580126	2.43283
						0.648074	0.807377				1.54417	1.28079
						0.940031	0.459038				0.152997	0.842975
						0.322149	0.657861				0.126599	0.880975
						1.04173	0.585694				0.160996	0.362437
						0.956208	0.234246				1.97515	0.209364
						1.76073	0.502294				0.314971	0.702863
						1.48008	1.68894					1.86262
						1.0126	2.88151					0.714394
						1.06811	1.30269					0.252914
						1.05374	0.346554					1.198
						1.57472						0.321325
						1.64957						0.440133
						1.70539						0.67673
						0.598221						-0.220468
						1.15814						1.59178
						2.36638
						1.43909
						0.556983
						1.06545
						0.8115
						0.0972033
						0.885916
						0.695148
						0.347085
						1.17124
						0.826271
						1.01522
						1.07274
						0.180102
						0.972342
						2.99139
						0.196404
						0.657521
						0.812479
						0.505994
						1.49254
						0.550709
						1.17367
						0.837454
						0.589673
						0.744513
						2.33005
						1.55702
						0.74509
						0.982986
						0.792857
						0.740939
						0.965239
						0.222347
						1.59108
						1.45596
						1.26703
						1.33046
						1.47881
						0.229582
						0.9846
						0.563125
						1.60727
						1.6066
						0.909514
						1.19192
						0.828971
						0.828071
						0.830251
						0.673163
						0.691523
						0.880247
						1.25229
						1.43654
						1.11702
						0.656047
						0.592194
						0.404237
						0.893932
						0.676257
						0.777641
						0.827074
						0.530101
						0.818007
						0.216589
						1.49512
						1.94272
						0.616961
						0.540835
						0.830247
						0.262333
						1.31417
						0.446364
						0.152241
						1.41248
						0.920811
						0.918986
						1.48138
						0.681212
						0.383894
						0.598568
						0.510497
						0.662468
						0.769427
						0.281761
						0.489555
						0.301118
						1.222
						0.662536
						1.07797
						0.874027
						0.191123
						1.73133
						0.870918
						0.550716
						1.10699
						0.749633
						0.296461
						0.909973
						1.24894
						0.347457
						1.60257
						0.585554
						1.35216
						0.688591
						0.556721
						0.623314
						0.530402
						0.483138
						0.190377
						0.595066
						0.356363
						1.90623
						1.2496
						0.413078
						2.31864
						1.11589
						0.944552
						0.722532
						1.8827
						0.488189
						0.598995
						0.779538
						1.30384
						0.261214
						0.892036
						0.860951
						0.123515
						0.965587
						0.641893
						0.463512
						0.703874
						1.17942
						0.173562
						2.6889
						0.338501
						0.271038
						0.359156
						1.47216
						0.179621
						1.39454
						0.617481
						0.659711
						0.503
						0.738583
						0.589835
						0.274745
						0.619234
						1.80711
						0.467918
						0.925174
						1.92361
						1.05347
						0.129955
						0.414961
						0.824626
						0.453072
						0.450809
						0.619897
						0.846076
						0.724737
						0.507754
						0.546826
						1.07618
						3.80169
						0.631531
						3.61841
						0.569786
						0.883632
						1.07065
